# Supplementary material for: Identification of Accession-Specific Variants and Development of KASP Markers for Assessing the Genetic Makeup of Crop Seeds
Source: Research Square preprint supplement (doi:10.21203/rs.3.rs-1119082/v1), 2021-12-29
Supplement: Supplementary file 1 [file a0550289c14b0ccdaac49850.xlsx]

## Sheet: Supplementary table 1
Supplementary Table 1. Information of individual accessions and their traits.
Number	Accession	Origin	Accession info	Trait
1	CNU_11411	Korean	C-33	Current breeding lines donated by Korean seed company Forming rose shaped leafy head
2	CNU_11412		C-34
3	26021	Chinese	E1	Forming long cylinder head Small number of inner leaf High thickness of leaf
4	26022		E2
5	28059	Japanese	Hiratsuka 1 go	Developed by shandong type Chinese cabbage before 1970 Forming leafy head Known as ancestor of current Chinese cabbage breeding lines
6	28061		Matsushima shin 2 go
7	CNU_11479	Non-pekinensis	11su-9	Not able to form leafy head Long petiole
8	CNU_11480		11su-10

## Sheet: Supplementary table 2
Supplementary Table 2. The details of sanger sequencing primer for confirming Accession-specific SNPs
Primer	Accession	SNP position	Forward (5’ to 3’)	Tm (℃)	GC (%)	Reverse (5’ to 3’)	Tm (℃)	GC (%)	Product size (bp)
1	CNU_11411	A07_20012970	GCTAGGGATAAGTCACGCAGG	61.14	57.143	CGTCTCACCTCCAACGTACC	60.567	60	310
2	CNU_11411	A09_37233481	GGCGTTTGGTGACAGGAAC	61.524	57.895	ATCCTCTTGCCTAGCTCCG	59.541	57.895	350
3	CNU_11412	A07_21781162	GAGGCATCAGTGGTCCTGAGT	61.662	57.143	GAACCACCCAGAAGAGAGGG	61.021	60	341
4	CNU_11412	A09_42427036	GCTGGAGAGAAGCAAGACG	58.842	57.895	TCCTCGTGGTTTCCGCTAC	61.192	57.895	332
5	26021	A02_18369509	ATGCGCTCGGACATACTCG	62.329	57.895	GCGGGCTTGTTCTTGTCTC	60.94	57.895	308
6	26021	A06_6118599	CTGGAGTCGCTTGTGCATC	60.574	57.895	CTTTACTCCCCACAACGGC	60.501	57.895	301
7	26022	A01_6548614	GGCTGGCGAGAAGGAAGT	60.497	61.111	GTGGAAGTCTGGAAACGCC	60.65	57.895	304
8	26022	A03_3737651	GCTCTTGACCAGCCATTCC	60.763	57.895	GTTGACCCCGTTGGAGCA	63.14	61.111	304
9	28059	A07_23181319	CACACCACCTCCTTGTTGG	59.981	57.895	CTCCTGTTGCAGCTCGTGT	60.195	57.895	343
10	28059	A07_23193769	CACGGTGAGTTCAAGCGAG	60.6	57.895	CTCCGGCAACGTCCTCTTAC	62.09	60	320
11	28061	A06_19890710	CAGCTCCAACCAAAGCAGG	61.918	57.895	CGTGCATCTCCTCAACAGC	60.574	57.895	307
12	28061	A10_450622	GTCATCCAGATCCTGACCCG	62.849	60	CCACCATGCGTTCACACTC	61.188	57.895	350
13	CNU_11479	A03_21060850	CACTCACGGAGGAAGAGCTG	61.143	60	GGTGTTGTGTTCTGGTCGG	59.988	57.895	316
14	CNU_11479	A06_3079806	CTAACCGAGCTTCGTCTGGTC	61.316	57.143	CTAAGGACATGGGTGTGGGG	62.497	60	336
15	CNU_11480	A01_11372183	CTGTCTCTGGGGATGCAGAC	60.829	60	CCTCCGTGGAAACGACATC	61.484	57.895	339
16	CNU_11480	A03_10121108	GAGTATCTTCCAGTCCCGCC	60.99	60	GCTTTGCAGTACCCCTCACC	61.973	60	326

## Sheet: Supplementary table 3
Supplementary Table 3. Details of developed KASP primer for accession-specific SNPs of 50 B. rapa accessions from core collection
#	Assays ID	Chromosome	Position	FAM Allele	HEX Allele	Target Accessions	Sequence for KASP development	Primer Seq Allele X	Primer Seq Allele Y	Primer Seq common
1	A05_1431680	A05	1431680	C	T	10071	CACACATATATGAAAATCTTTATGAATAATATACACATAAGGAGTATACCCATAACCGGACCAACAGCAAACTCTATGAATTTGTACGTTGTTATTGTGGAGATCAAAGATATCATGGAAAGGACACCNAAAGCCAAAGAGATCTCGTCAACGTATCTACTGAACGGATACCAGCGATGGCATCGGCAGCTGAATGCCTTAACTAATAGGTACATCAGGAAAGTTACGCCGTAGATCCTCAGTCGTATCA[C/T]CGACCGTTGTGCCGGATGGCGGAGCTGCCGCGACTCCATNATTATCGTTTCTGTTAGCCGTCGTATCCATGAACACGAACACCATCAGGAAGACATTGATGATCAATGTGTGTAGAGCGGCTGAGAGCAACTCGTATTTGCGAG…	CATCCGGCACAACGGTCGG	CCATCCGGCACAACGGTCGA	TTACGCCGTAGATCCTCAGTCGTAT
2	A07_12494895	A07	12494895	G	A	10071	GATGAGATCGCAGAGTAGGATCTGTGGCTATGCAGCATTACCGATCCGTTGGATTGATGTAGGATCAATGAAGCTCCACTTGTCTGTGAGCTATTTATCCACGAGGCACCTAAATTACATTTAATAGCATTATGAGGAGGGCACTTNCAGCCCAATGTTGACCCTACATTAGGACCTGTCAAAGTAACAGACTATGTATCAGAGCAGTTTATTGACAACCACATGTCTANATCCTCCTTTGCACGAACTA[G/A]AGCTGATGCAGATTCATATCTCATTTGCTCAAAGACTAGTGCATTTTGGGTCTTCCAAAGGTACCATAAAATCCAGGAAAACGTTCTCAAGAGAGTGGCATCCTCTTTCTTGTATTGATAACTACAAGGTGGAACAAGTTCAAG…	AAATGAGATATGAATCTGCATCAGCTC	CAAATGAGATATGAATCTGCATCAGCTT	AGAGCAGTTTATTGACAACCACATGTCTA
3	A01_9959456	A01	9959456	T	C	10073	AAACCCAAAACAAGAACCAACACTGATGATCAGAAAGAATCAGACGCAGATGTTGAGGAAGAAGAAGAAGAAGATAGGTATGTGGAAGCTCTGGGAAGAAGAGAGAAATGGTGGTTTCACAGGCTGATAGCAATCTCCTCTTTCGTCGTATTCGGGCTGATCCCACCTCTCGTATACGGTTTCTCGTTCAGAAGAAGAGTCGAGAAGAGACAAGAGTACAAGACTTTAGCGGTTTACGCAGTGTCTCTCC[T/C]CTGCATCGTCTTGCTCTCAGTTGCGAAAGCTTACGTCTCGAAGAGACGCGAGTATGTCAAGACTCTGTTTAGGTACACGTCAATGGCGACGACCGCGTCGGGATTCTCTACGTTCATGGGATATTTCGTGAACCAGTGGCTTGA…	CGGTTTACGCAGTGTCTCTCCT	GGTTTACGCAGTGTCTCTCCC	CTTTCGCAACTGAGAGCAAGACGAT
4	A07_28731110	A07	28731110	C	G	10073	TCTTCTTGTGATCATGTCACAGAATGCTATGGTATTCCAGATATATGCCATACTCTCTCGCTCCTTTGATTCCTCTGTTCCCATGGAAGAGCCTCCTTCCTACAGAGGCGTTGCTCTTGGTGGGGTTGGCACTGGCGCTGTGCAGAGCCTCTTGCTTAGCCCCGTTGAGCTCATCAAGATTCGTCTTCAGCTGCAGCAGAGCAACAGCGGCCCCATCAGTTTGGCTAAGACCATCCTTAGGAGAGAAGGG[C/G]TCAAAGGGATATACAAAGGCCTCACCGTAACTGTTCTCAGAGATGCTCCAGCTCACGGGTTTTACTTCTGGACTTACGAGTACGTACGAGAAATGCTTCATCCCGGCTGCAGGAAGAGTGGAGAAGAAACTCTTAGGACCATGC…	GAGGCCTTTGTATATCCCTTTGAG	GAGGCCTTTGTATATCCCTTTGAC	GGCTAAGACCATCCTTAGGAGAGAA
5	A06_247236	A06	247236	G	T	26015	CTGATGTACTAAAAGAACTTGGTCTAACATACAAGCAAATAATTTGGCAGATGGCTTTGTCTAGTGAGACCAAGGAAGATGAGAAAAAGAGTGTTGATGGAGGACCTGATAATTCAATTTTAGCCTCATCTAGTACTGTTGAAAGAGAGAGTGAAGAGNACTCAAGAAATGCTTCAGCAGTTAGATACACAAACCNTGTATCCATTAGAAGAAGTACCTCTCAATCTATTTGGCGTGGTGGTCGTGATCT[G/T]TCTGTTATGCGTTCCATCGAGAGTATGCATGGTCGTACACGACAAGCGATTTCCCGAACGAGGGGTGGGAGAACTCGTCGACACCTGGAGGCTTTTAATTTTGATTCTGAAATTCCACCTGATTTACCAGGTACATCATCTTCC…	CTCGATGGAACGCATAACAGAC	ACTCTCGATGGAACGCATAACAGAA	ATCTATTTGGCGTGGTGGTCGTGAT
6	A06_24999907	A06	24999907	T	C	26015	TCAATGCCACCAACCGCAGTCAAAGAATCAATAGCATCAGGTCCTAAGGATGGATGCATCACCAAGACACCAGCAAGAGCACCAAGTAAAATAGGTATCTCTTGCGAAAGACAAAACGATGCAGATAACTTTTTTCTATCACACAGCCGTTTAGCATGTTNCCTAAGTAGTGAATTCCAAGTCACTGGTCCAGGATAAGTTTCCTGTGATTCACTTCCATTGATGTAAGCCATTCTGAGGAAGGAGGACG[T/C]GGAAGGTGCATACTCATTCTGAAAAGAAAAAAAGAACATTCAAAGACTCATAGAGCAACTTGATTCTTTTGAGAAACACTTTGACATGAACATATTTCCAAAAGAAAATAGCAAGTTTCTCCACAGGAATCAAACCTGATGCCA…	TTTCAGAATGAGTATGCACCTTCCA	TCAGAATGAGTATGCACCTTCCG	TTCCATTGATGTAAGCCATTCTGAGGAA
7	A02_18369509	A02	18369509	C	T	26021	AACAGCTTGAGGAACCCATTCACAATTGTTATCCCAGTAAGCAACGAGCTCGATATCCAAATAGCCCGATTTCCAAGTAGCCCGATCTTCACATAGCTCGATCTTAGCATCAAGTTCGATCTCCAATGCGCTCGGACATACTCGAGGAGCCGACAATGCATCTTTCTCCCTAAAAACGATATGCCGATGAAATATAAATATTTTGAGAATGCATGTTGTCTAATGGTATCTCCAAACGAAAACAAGACCA[C/T]AACTGGCAGGAAGCACGTGATAATTCACAAAGGCGTGCTAGGACTTGTACACGAATCAAATCAATAGTTCATAGCCTGAATGCACCGCCCTCTCATCGTCTACGCAAAAAACACATGATCAAACATCTGACACCATTCTCATCT…	TCTCCAAACGAAAACAAGACCAC	TCTCCAAACGAAAACAAGACCAT	TGTACAAGTCCTAGCACGCC
8	A06_6118599	A06	6118599	G	A	26021	ATCCTCTATACAAACTAATCGTGGACTGCAACAAGCTCACAGTAGATATCGAGAACGAGATCGTCACCGTCCACGGCTTTATCCGTTCCAAATACAGACCTAGGTTTCCAGAGCTGGAGTCGCTTGTGCATCACGCAATCGAGTACGCTAGCGTCGTGAAACAGATCGGGGACGAGAAGGACTTAACCCTAGTTACTCTCAAAGGTCTCTCGGCAAAAAGTACTCCCTTATCTGTTTTACTCTTTGCTTC[G/A]ACCACTAAAGGGAAGCCTCTCCCAGAAGGTGTCTTGCAAAAGACGTTAGAGGCGTGTGATCGAGCTTTTGAGCTTGACTCCGCGCTGAAGAAGATTCTTGCCTTCGTTGAAACCAAGATGGGATGTATAGCACCGAATCTCTCA…	CCCTTATCTGTTTTACTCTTTGCTTCG	CCCTTATCTGTTTTACTCTTTGCTTCA	CACCTTCTGGGAGAGGCTTC
9	A01_6548614	A01	6548614	A	T	26022	TTCCTGTTTGTCACTTCTTTTAATTGCCTTTGATATTTCTTCTTCCTGTCTGATTACCCTTTCTTTTTTACTGGGAATTCTCTGGATATTTATATGTTCTTACATAAACCCACATTTAGAATCTACGTCTCTGACTTGTTAACTTTCTGCAACAAACTGCAGAGATATTGCCGTGGTTGGCTGGCGAGAAGGAAGTTTTATCTTCAGAGAAAAGCAACAATATGCATTCAGAGTGCTATCCGAAAATTTA[A/T]CTGCATTATGTCGTTTCATGGCTACAAGCATGCAGCCACAGAGCTTCAACGGCTCGTTAGAGGACAAATTGTTCGAAGCAGGCTTCAAGGTATTAAGCAGTTTCTCTGGTACCTTATTTTTAAGCTGATTACATATTGATTTTT…	TCAGAGTGCTATCCGAAAATTTAA	TCAGAGTGCTATCCGAAAATTTAT	TCTGTGGCTGCATGCTTGTA
10	A03_3737651	A03	3737651	A	C	26022	ATTCACAGATTCTTCTCTCTTATAGTCATCAGTACACACTACATTTTGCATAAAACTTTCCAATTTAGAACTGTTCACCAAGCTCTTGACCAGCCATTCCTTCTCTGCTAGCTTTCTTAAAGAAGTCCTCAAGCGTGTGTTTCACGTAACTAAGCGTCTTTTTGTCGCTATACTATTCAGTCTCTGGATCACGAATCAGCATACTCTGTGCGACGTAATACCTATCTTCCCAAATTCAGCAGCCTCACCA[A/C]CCGCAGGAAAGATCTTTGCGACAGAATCAAGAACTCCTATCACGAAGTCCATTATCTCGATAGGAACTTTCAAGAACTTAGGCTCACTGCCTAGAATCATAAACAGGATCTCTCCTTGCTCCAACGGGGTCAACGCATTCCCTG…	CAAATTCAGCAGCCTCACCAA	CAAATTCAGCAGCCTCACCAC	AGGAGTTCTTGATTCTGTCGCA
11	A03_16004386	A03	16004386	A	G	28052	ACAACCACCCCTCAGAATGATCAAAAACCAAACTTCTTTCGGCGTAGGCTGATGGTGAGGGATCTTCAACTGATCCAAGTGAGTTCATCAGCTTCTGTATTGATAGTCGGCAGTAACACCAGCGACGATATTAAATGGTTGGTTTACATGATTGTATTAACGACCAAATAACATGAAATTATAATCAGCAAACCTGGAGTTTTTGAAGTTGAGACTTAGCATCAGATAGCATATTCAGATTATGAGTTGC[A/G]GCCCCATGAGAATTGGAGAGACTTTCCAGTGCTGACAACACTGCAAACTGAGAGAAAAGTATTAGTAACAAGATACGTTAAGGACCTATTAAAATAATGCCAACGAAAAAAAGATTCTTAATATGGAGAGTACCTCATATCTTG…	CAGATAGCATATTCAGATTATGAGTTGCA	GATAGCATATTCAGATTATGAGTTGCG	GTCAGCACTGGAAAGTCTCTCCAAT
12	A05_5353523	A05	5353523	G	T	28052	CATGAATGGTTGAATTATCCTATTCGAAATCCGTAAATTAAGAAGATTATCTCNTGGAAAGAGCCGATGAATTCTCTGTCATCGTCTGGTCTTGTTAAGCTTTTTGACTNGATCCTGCTGTTTCGATATTTGCAGTACATGAGAGAATGCATCCTCGCGAATTTCAAGAGAAGATTTNTCACTGCACTACAAACTGATAATGATCTTCAACGGCCTTCTGTGTTGGAGTCTCTTATAAGGCGGCATATGA[G/T]CATAGTCCATTTGGCAGAGCAGCACGTTAGCATGGACCTAACCCAAGGCATCCGAGAAATTTTACTCACAGAAGCGTTTTCAGGGCCTGTTTCNTCTTTGCATACGTTCGAAAAACCTGCTGAACAACAGCAAAACACTGGATC…	AGTCTCTTATAAGGCGGCATATGAG	GAGTCTCTTATAAGGCGGCATATGAT	GTGCTGCTCTGCCAAATGGACTAT
13	A01_3232453	A01	3232453	C	T	28053	TGAAACCCTGACGCAGACTTAACACCAAGCCTAAACTTCCTGCTCCTTATCCAGCTCGAATTGTCGGTGAAAGAAAGTTCTCCTAGAGTTCCTACGCCTTCCTTAAGTACCACATGAATGTGACCAGTCAATATGGGACTTTTTCCTTGGCGCTCTTTCACAACAAAGCTCTCAAAACGTTCTCTCGTCCAATCTTCATCGTTGAAGTCTCCATCTAACACGACAACGTTCAGCTTTGCCGTTGAATCTT[C/T]TCCCGTTTGAACAACGTTTCCTGTGTTTGCATCTGTAAGGACCACGTGAACGGCTGAGCCCTGCTCTCCTTCGACTTTCCCTCCTGTGAATAAATGAGGAGGCATGCGTGTTCTGAAGCGAATTTGCAAGTTTCTTCCATTAAG…	GTTCAGCTTTGCCGTTGAATCTTC	CGTTCAGCTTTGCCGTTGAATCTTT	AGATGCAAACACAGGAAACGTTGTTCAAA
14	A08_11057296	A08	11057296	A	C	28053	AGATCCTAAGTGAAAANGAAGCATTACANGGAGAAATCAATGTTCTGGAAATGAANNTAGCTGAGACTGACGAAAGGATCAAAACCGCTGCTCAGGAGAAAGTACGCGTAGAGCTTCTAGANGAACAGCTAGAGAAGCTTCGTCAAGANATGGTTTCTCCTCCTCCNGAGAGCGATGGTTACGTTCTAGCTCTCAGCANNGAGATAGAAACGTTGANGATAGAGAATNTGTCTTTGAGAAACGATATAGA[A/C]ACGCTCAAGTCGAAGCTTGAGAGCGTTGAGAATACAGATGAACGTGTGGTCGTGTTGGAAAAGGAATGCTCCGGTTTGGAGTCTTCTGTGAAAGATTTGGAGAGTAAGCTGTTGGTTTCTCAGGAAGATGTTTCCAAGCTTTCC…	CTCAAGCTTCGACTTGAGCGTT	CTCAAGCTTCGACTTGAGCGTG	GATGGTTACGTTCTAGCTCTCAGCA
15	A07_21078330	A07	21078330	G	T	28059	TGTTCTNGAGAGAATATAACTCATTATTTTTCTTGTCAAACTAGAACAAGCTTTGCACAGATGCTTGTTATGCTGACTGCTGAGTTATATTCTTTGATCTTCAACTCTANGAAAACAAAACAGAGACGTGGCAAGAAGAGAAAATGTGTTTTCTCCAAATAGCATCACTCACATACATGATCTTAAGTTGATAAACTTCTCTCAAAACCTTCAGATCTACGGTACCTATTCTTNCTNTGAACATNAAACT[G/T]AAGTGAAGCAAGCTTATGCGAAACCGCAGACCAAATCATATCCACCGAGTCTCCAGGCTGAGAAGGAAACCGATACTCAAAACACCTANCAACCTCTTTGAGTCTCTCCCACTTCTTCCTCCACTGATCCTCAGTTACCCCTCT…	GTTTCGCATAAGCTTGCTTCACTTC	GGTTTCGCATAAGCTTGCTTCACTTA	AAACCTTCAGATCTACGGTACCTATTCTT
16	A07_23181319	A07	23181319	G	T	28059	CTAGTTCTTCAGCCGACTTCTCCACCGCCTTCTTTCCTCCTCGGCCGCCTTTATTCCCTCTGCCACCACCGGCTTGGCCTCGGCCTCTACCACGAAACCCTCCTCGACCACTTCTCACACCACCTCCTTGTTGGTTTCCACTGCCATTAATAGAATGTATGATATGATTAAATTATAAAACCTATACATGATCGCTCACATATGATTAGCCGAAAGCGAGGTCGGAGTCTTATCACTTACATTGGAAGGC[G/T]TCTCATAGAAGGAGCTGCACTTCTTCCTCTTCCTCTCCCACCTCTAATTCCTTGTCTGCAAGAATGAGACACTTTAAGTCTTCACGCTTGATCATCAAAGACGCGCAATCTCAACTATGCTAAAATAAATGGCTACATACCCGA…	GTCTTATCACTTACATTGGAAGGCG	GTCTTATCACTTACATTGGAAGGCT	GAGGTGGGAGAGGAAGAGGA
17	A03_22285257	A03	22285257	G	A	28061	ACCAATTTTCTTGAGATAAGATGCATCGATCAAACTCTCTCCCTCCTGTACTGACGCTGATTTCACCAGAGCAAATGAAAAAACAAAAAAAGCAAAACACACTACGTCAGAGTCAAGAACAAGCACTTGAAGATGTATATGATGTTTTCTAGCCAAAATGAATCTACAATAATTAAAGGGCTTTTGACTTNGAAAACAAAGAGGAGAAGGTAGTATGCATACTTTAGCGGTATTGTCAACCACATCTCCA[G/A]CATCAAAACGTTGAGCAGCTTGATTAGAAGTTCCAGGAACGAGTGCTAATGACTTTTTCGTCACGAGAAAGACCCCCCAAAGGAAGTTCTTTGTTTTCTTCTGCATCTCAATGATAACTGACAAACACAAAACAAGCATTATTC…	GGTATTGTCAACCACATCTCCAG	CGGTATTGTCAACCACATCTCCAA	GAACTTCTAATCAAGCTGCTCAACGTTT
18	A10_450622	A10	450622	A	C	28061	GTTTGGGCTCCGAAACCCCGGTTTATACTTAAAAAGTAGGCCCATACAAGGCCCATTAAGGTTTAAAACAAGTCATCCAGATCCTGACCCGGATTGCGGACCCGGTCTCGGATTCGAGTTACTTCTCATGAGAAAGAGAGAGAGAAGGAGAGCAGCTGAGTAAGAGATGGCGAGCGAATACAGATGCGTGGGATGTGGGTTCAGGGTTAAGTCATTGTTCATTCAATACTCTCCGGGCAACATTCGTCTA[A/C]TGAAATGCGTAAGCTTTATGAATCCTCTTTTAACTTTAAATTTTAGGGTTTTTTTTGTTCTTTCTTTCTCAAAAGTTTCCATCTTTGTTTCGAACACATACACATGTTTTCTATTTAGGGAAACTGCAAGGAAGTTGCAGACGA…	TCCGGGCAACATTCGTCTAA	TCCGGGCAACATTCGTCTAC	AAAGAGGATTCATAAAGCTTACGCA
19	A06_20416979	A06	20416979	C	T	CNU_11377	CCAAATTGAGAATCAAGGTAAGGTCTAATGTTAAAAAAGAGTAAGAAACTACTGACGTTAGCTCGAAAACGCTGCCGTCGGTTGTACACACAGGATCCTCGAACGGCAGAAACGTAAGCCTGAGATTGAATCCAAACTTGATAAGGANGAAACTCACAAACGNTAATTCATATAAAGGAANTTACATACGCGCAGCAGTAGAAAGGAAGGCTCTTGAAAGGAGTGCGATTCTCTTTGGATTTAGCGCCTC[C/T]CCATTCCGTTGCCCACTCCGTCTTCGTTATGAACATTCGATCCTTGCTATGCTGCTTCTTCCCCATCGTTCNACTTCTTCTTCGACACGAGCTGATGATGATAGGTTTAAAGTTCGATTGAAACCCTGACGTTCCGATTTGGGA…	ATTCTCTTTGGATTTAGCGCCTCC	CTCTTTGGATTTAGCGCCTCT	GAAGACGGAGTGGGCAACGGAA
20	A07_27815519	A07	27815519	G	C	CNU_11377	AGCTACNTCAAACAGGCATGGGAAGTACATGTTCGTTGTCCACGAGGACCACAAGGACGAGATGTGCGATGTTATGCTTGTCAAAAGCTCAGACAAGGGTTGTTCTAAAATCTCTAAGGGGCGTGAACAGTCGCGTGTGATCTTGAACCANTACAACGGCATTGCGTCGCAGATTAGGCATGCTAACAACATGGGNTTCGAGAAAGATGTTTCTGATGTGTTTTGCTCTGAGCTCATCAAGAAGTATCAG[G/C]TTGATGAAGATGAGATTTAAGATCTTTGATCAGTGTCATTATGATCTGTTGTTTTCGATTTGGTTTAATGAGTTTGGTTATGGAAGAAATATATTTGTACTTCTTTAATATTTATTTGTCNTAGATGATGATGATGTCTCCAGT…	CAAAGATCTTAAATCTCATCTTCATCAAC	CAAAGATCTTAAATCTCATCTTCATCAAG	TGTTTTGCTCTGAGCTCATCAAGAAGTAT
21	A02_30120610	A02	30120610	T	C	CNU_11378	TGGCTTCGTTTCAGGAGAAACAATTGTTAGAAGAGAACGTCCGGTTACATCAAAAGGTAATTCATCTCTCTTTCCGATTCATATATATATATATAGCCCATTTCAAAAACAAAAGTGAGATTTTTTCACCTAGTTTTGCTTACAATTTATTCAAATGTAGAAAATTATATATGATGCTATCTTTGTGTGGTTGACTCCAATGCAATCTATGTTATGAACAGACTGTTTTAGAACCATGGAGAGGGTCGAC[T/C]GATCAACAAGAGAAATTCAGAGTCATAGATCTTAATTTGGAAGTAGAAACTGATTTAGTCATCGGTTTGCCAGAGAAGCACTGCAAATAACATTATCTTATATGTTCTTTAACCAAAACAATATAATATTTTATGTTTGTATTT…	AGAACCATGGAGAGGGTCGACT	GAACCATGGAGAGGGTCGACC	GATCTATGACTCTGAATTTCTCTTGTTGAT
22	A06_23619289	A06	23619289	C	A	CNU_11378	CTGAAAAATTAGNTAACAACTCTAATNTTACAATATTTACATCTCACTCTTGAATATTTCAATTGATTATAATTTTTTCACTCAAAACTCCCCAAATGAAATGCAGATCTACAGAGAATGCGAGGATGCATGGAGGCTAACTTTAAACGGAGACCTGAACATTCCGGTGGCGAGGGCGGANGAGTTCTGCGAGGGACCATGCTTCTCCGAAACACATTTGGCTTTGAATTGCATTGATGANATTGTTCAC[C/A]ACTTCAGATTCTTCAACAGAGCCACCGTTTACAACATCCGTGAAACNCTCAAGTCCGGCTGCAGCTACGGACCTGAACGAGGTTTTGATTCCAGAGACCATTTCTTGATCTGGTCTAGACTGGTTCTTTTGTTTCTTGTTTTAA…	GGCTCTGTTGAAGAATCTGAAGTG	GTGGCTCTGTTGAAGAATCTGAAGTT	CCGAAACACATTTGGCTTTGAATTGCATT
23	A03_15694374	A03	15694374	C	T	CNU_11379	ACCCTTTGGANATATCTNACTGTATTCACGTCCAACGCAAAAGCTTTAGCCAAAAGCCTTGTATCAATCAAAGGGCGGGACCCGAAAAGNGTTTTACCAATCGGAACCACACCAGGATTTTGACTCCCGACTNCACCAATCGCAACCGCATTCGTCTTGCCAATATTAGCATGAAACTGAACCAAACCGACGGNAAAAGCAAATACATCTCCGGGATAAAGAACCTTGGAGAAGAGCGTGGAGTTGTAGT[C/T]GTTGGAGGACACAAACCCGACCAAGAGCGTTCCCTCGAGGACTAAGATCANTTGGGAGGCACGTGGGTGTATGTGCGGTGGGATTTGTCCTCCAGGGGCGAAATCAAAGCGGGAAANGGCAACTCCGAGAGTGTTGAGACCAGN…	CGGGTTTGTGTCCTCCAACG	GTCGGGTTTGTGTCCTCCAACA	CTTGGAGAAGAGCGTGGAGTTGTA
24	A06_18323436	A06	18323436	T	C	CNU_11379	AACAAATGAAAACGGATCTAAAATGTAAAAAAAAATAACNTCAATAAGATTCAACAGAGTTTCACAATANTAATAACCAGCCTCAGCCNTTGACTAACTAAGTCAACGCTTTATTTCATGATTCAGAAGTAGTTGTTATACCTNCCCCCTCAATACTGAAACTACAAGCAGTAGAGAGGGGTAGTAAACTACAAAAACTNCACTTTTATTCGATGCTTACAGCAAAACTAAGTGCTCTCTTTNGCTCATT[T/C]AAGTAGATGGAGGAAGCTCCCAACCTTGTGGAATCGGACCGTAGTCATAGATGACCTCTCTGTGGCATGACCACACCANCTTTATTGCCTCTGGTGTTCCTATCCCTGCTCCTCTTGGATCTCCAGCAGGTCCAAACCTGTGTG…	TGGGAGCTTCCTCCATCTACTTA	GGGAGCTTCCTCCATCTACTTG	TGCTTACAGCAAAACTAAGTGCTCTCTTT
25	A01_14908732	A01	14908732	C	T	CNU_11381	AGGTTTTTCGGAGATAATCGATCACGTAAGGNAACCNGAGCTTTAAACTCTGTGGAAAAATAGTCGTTCAACTCGAGCTGCAACCCTAGGCAGAGGATAGTAGAGAAAGAGTTGAAGACGAANACTGGTGGGCTCCAGNAATATATTANAAGACCATTTATATNTCTNTCGAAGCCCAAATAAGAAAGTAGTGTAGATGCAACATACNGTAGTGAAACGATNAGTTTTGTAAGTTGGGACAGGTGTCATG[C/T]TCACAGNGCTTGACTTTCTGAGCTGGCTGCTGAGGTGGNGCGTCNTGGAGAGAGATANCTCTACTTTATAAATCAAAATAGACCTACAGCNCATTCNGAATTAAACCAAAAGANCCAAAATTAAGCNCCGTAAAAANNACATCA…	GTAAGTTGGGACAGGTGTCATGC	GTAAGTTGGGACAGGTGTCATGT	TCAGCAGCCAGCTCAGAAAGTCAA
26	A01_17612012	A01	17612012	A	G	CNU_11381	AATCGTGTTTAGGCTTGTCACCCTTTATCTGTGCATGTCGTCGCTGGAAAAAGCCACTAGATGTGTGCAGCAGGTGACCTCACTCTTGCCTTCCTTTTTATCTGCCGATGATGAACAAAGCAAGAGCAGATTGCATCTCTTTATTGGCTGTTTACTTTATGTAAGATCTCAATATGGAAAGCTAGATGATGGTGCTCGTTTTCATGTAATATCGCACCTGATACGTGAAACTGTAAGTTGTGGAAAGTCC[A/G]TCCTGGCCACCAGTGGTATGAGTAAGGATGACAGTTCTGAATCTGGTGGAATCTTCAAAGAAGTGGGTTCTATCCAGAATCTTATCCACAAAGACCGTGTGCTTGCTGCAGTCACTGATGAAACGACATACATGAAAACATTAC…	CATACCACTGGTGGCCAGGAT	CATACCACTGGTGGCCAGGAC	CTGATACGTGAAACTGTAAGTTGTGGAAA
27	A05_15472735	A05	15472735	G	A	CNU_11383	GGTTTTGAGGTCAACTTGTGGGCAAGGTGGGGAGCAAGAATGGTCCGAAGAATAACATCAAGAAGTTGAAGATATATGTTCCTCATTTTGATAACTCTGCTAATGAAATGGTTAGTGTCGTGTTTTTCTCTGCTACTAGGTGGGAACTTGGGCTCGGCTTTCTTGGACAAGTTATAGTCCTACTAGCCCTACAACTGGTCCCTTTAAACCAGTTACAAAGGGCAGGATTGGAGCTGGATAAGGTCTTCAT[G/A]TTGTTCATTATGGGGAAGAGGTCTGAGGAGCGAGTATGGTCAAGAGTATACTCAGCAGTGAGGGGACATATATTGGCGTTTGTTTATGAAATAGGTATCAGTGCAGGTGTTGGAAACGCAAAAGACTTGGCTGGAAATCGTATA…	ATTGGAGCTGGATAAGGTCTTCATG	GGAGCTGGATAAGGTCTTCATA	CCTCAGACCTCTTCCCCATAATGAA
28	A08_2334823	A08	2334823	G	C	CNU_11383	CCNCATCTTTTTTTTTTGTTGCNTGATGNTTTGTNTTGTTTGTCTCCTCAGGGTGAAGGAGCAGATGCNTCCCCTTGTCTACGGCCGCTGAGTTTGGATGACTTCATTCAATCTAAAGCTAAGGTATTATTCTAGTTGCATCGATCTGTATCTTGAGTTAGCGTTTTGTNNGNCNTTAGCGTTAGCAAAGATGTGATTGTGACACCATATGTATGGATGATGTGTGGTTGTGTAGGTGAGCCCGTCGGTG[G/C]CATACGATGCGACGACNATGAATGAGCTGAGAAAATGGAACGAGCAATATGGTGAAGGAGGAAGCAGGACTAAGTCTCCTTTTGGCTTCTGAAGAAAACTTTCAGCNTTGTTAGTTTAATTTTTTTTAAGTGTTTACACANCCA…	AGGTGAGCCCGTCGGTGG	AGGTGAGCCCGTCGGTGC	TATTGCTCGTTCCATTTTCTCAGCTCATT
29	A06_22239277	A06	22239277	A	C	CNU_11384	AGGAATGCTTGANCTCATTCTTGTGCTACGTCTCAACTTAAAACTTGGCTTACCAGACTATCTCTTCATAGTGGTCGANGAGGTAGTGTCTCAGATGATAGGACGCNTGAAATGGATGCCGCTNCTCGTGCTCACTTCAAAGCTNTGTCCTCACGGNATTGAAGGGACNTTCTTTGCGTTGCTNATGTCTATCGACAATGCAGGCTTCATGACCTCGTCTTGGCTCGGAGGAGTGTTGCTGCACGTCCTT[A/C]ATGTGACTCGGACAGAGTTTGGTAACCTCTGGCTTGCGGTTTTGATNAGGAATGTGTTGAGAGTTTCGCCGCTCTTTGTTCTGTTTCTTGTGCCNAAGGGAGATCAGAACACGTTCAAGCTCCCGGGTGAGATCATTGGGGAAG…	GGAGTGTTGCTGCACGTCCTTA	GAGTGTTGCTGCACGTCCTTC	GTTACCAAACTCTGTCCGAGTCACAT
30	A07_14776075	A07	14776075	G	C	CNU_11384	GAATTATTATCAGTTTGATCCCACGAGAATGAATAATTCAGAAAATGTTCAATCTTATGTTCAAAACGAAAATTTCACCCCTGTTTCACAACCATCTTACTTGACAAGAGATCAAGAGCATGAGATCATCGTCTCTACTCTGAGACAAGTGATATCCAGCCCCGGTGGTGACACTTCTTCATCAAACTGGATCGCTAGTGAAGCTCTTCCGCCTCCGGACGCTGGCCCTTGTCCTATCTGTGGTGTCACC[G/C]GTTGCTACGGCTGCGCTTTCCCACGGCCCGCAGAGATAAAGAAGGAGAAGAAGCACAAAGGAGTGAGGAAGAAGCCATCAGGTAAACTGTATTTCAATATTATGTTCCAACATCTTATAATCTGTTCGCCCAATTTATGTATAA…	GTCCTATCTGTGGTGTCACCG	GTCCTATCTGTGGTGTCACCC	TGGGAAAGCGCAGCCGTAGCAA
31	A06_11226932	A06	11226932	C	A	CNU_11386	ANTCATNAAGTAGTTCCGAAGGTGAGAGCTTAAACGGTTATACATTCTTTTGGGGAGGTCTCGTCAGGATTGACATCTTGAAGGTAAACAATATTACCGGAATGCTAAATTATGTATGTGAGTGTGGGTATTAATNAATATGTGAAACCGTGACATACTTTGAGCTNTTTCAGGCTCTACCAGAAACACGTTTCACATTCTATGGACCAAAGGCTCTTGAGATTCATGTAGTACCAACCAAAACAGCAAC[C/A]GAGTTTTACCAGGTAAAGTTTCTTTACACCATCAGTATCAACTCCATTGCTAATTCGAGAACAAGTTTTACCATTTACTTGGGTGTTCTGCAGAAAGAAGTGGGCGTGCTTCTGACACCTCCATCAGGGAAAGATCAGATACAG…	GTAGTACCAACCAAAACAGCAACC	ATGTAGTACCAACCAAAACAGCAACA	CTGATGGTGTAAAGAAACTTTACCTGGTA
32	A06_17925877	A06	17925877	G	A	CNU_11386	TATACCTGGAGCGTTTATGTTGATCACACTATTATATGGTTCATGTNCAGGGGNTGATAACAATCATGAATATGATATNCCTGGAGCTGGGCCTGTTNNATTAAAACCTTTGAAAAATTTGTCCAAAATAGTCTCAGCTACCTCCTCTGGATGGCTTCTTCTTGAGATACAGAAGGATCAACAGCCTCTGACAATGTCATCCATGTTGAATTTGTGTATGGTGCATTATCAAAAAGCCACGCAATGCTTA[G/A]CTTCCAAGCTTAGGAATGGGCAAGACCAAAGCTGACAATTGCTCATTCTTAGGATTTTATCTACTCTTACGCTCAAATAAATTGACTAGGATTACGTTTTGTTCTTGAATCATGTCATTGTTGGTCTTTTATCTTCACATTTTT…	GCCCATTCCTAAGCTTGGAAGC	GCCCATTCCTAAGCTTGGAAGT	TGCATTATCAAAAAGCCACGCAATGCTTA
33	A02_13906384	A02	13906384	T	G	CNU_11387	CTTTTCCTTTTCCTTCTTCTTGCGCTTAGCCTCCTCAGCTTGCCTCTCAAGCTCTTCCTGCCTAAGACGCTCCTCTTCCTCCTTTCTCAATTTCTCCTCCTCTTCCTTCTTCTTTCTCTCTTCAGCTTCTTGCCTTCGTGCAAGAGCCTCTTGCATCTCTCTAACATGTTTCGGAAGTTTCTTCTCAGCTGCTTTACCCTTTGCATCCTTCTTCTTCCCCTGCAGTGGCTCAGCTACTGATTCTTCTTGC[T/G]TGTCCTCCTTAGCCTCCACAGAAGAGGTTGCAGCTGCTGCTTTCTTTTCCTTCTCTTTCTCCTTCTTCTTTCTCCTTTTCTTCGCTGCAGCACTCTCTTCTTCTTCTTCCTTCTCACCAGCATTCTCTACAGGTGCAACTGGCT…	GTGGAGGCTAAGGAGGACAA	GTGGAGGCTAAGGAGGACAC	CAGTGGCTCAGCTACTGATTCTTCTT
34	A08_1565662	A08	1565662	G	A	CNU_11387	AATTTTATAAAACNAAATTANATATATATAGCTAAATTGTATTAANANATTAGTATTCTTTTTGNTTGAGAACCNCTCTAAGGTTCTATGCAATAAGGTTGCTCTAATATCTATACTTTATGTAAAAATATATGTTTGTATACGACTGACTTACGCNATTCCNTGAGCAAGAGTTGTGGCNATGTTCAACCTCATGTTCCAGTCCAAGCTCCTACCACCTCTAGGCACATGATGCAGCCACCTATCAAGC[G/A]GGCCATTGGCTATAAACTCATAAACAATGAACCTCTCTCCATGATCATAGCAACAACCTTTAATAGCAACCACATTCGTGTGATGAAGCTTAGCAGCTCGTTTAATCTCAGAGTAGAACTCTTTCTTCCTCTGAAAACTCGACC…	GTTTATGAGTTTATAGCCAATGGCCC	GTTTATGAGTTTATAGCCAATGGCCT	GCACATGATGCAGCCACCTATCAA
35	A04_19029387	A04	19029387	G	A	CNU_11388	GATTGTTGGTGAGCCTTCTGTTGTTAGCTCAGGGTACTTATCTAGTATCTCTCGGGATAACACCGTGTAGCGGGTCTTCACAGTTGTGGTTTTGCCTACGACACAAAATATTAGTGNAAGAGAGAATATTTAAATGANGGCAGAGACGAAACTAATACAAGAGAGTGAGAGGCTTTACACAAGTGTTCTAGCTTCTCTTTGATAAAGGGGTCATCACATTTGGTGTCACGTAGAAANCCCTCCACTAGAT[G/A]CTCCTGAGGAACCACTTGGCTTGGGAAGGCCTTGCCAAGAGCAAGCACTGTTGCCTTTCCTGGATTTGCNACACGCCTTGTGCTGATTTGCTTCTTAACACCATTCATNCCAGAGCTAGACATCTCTCTCTCTCTTTCAGGTAA…	GCCAAGTGGTTCCTCAGGAGC	AGCCAAGTGGTTCCTCAGGAGT	GGGTCATCACATTTGGTGTCACGTA
36	A05_763454	A05	763454	C	T	CNU_11388	CTCTAAATATCCCGTCAAAATACTCCGTCTCTGTTTTCTATTCGCAATTCTCAGACCATGACTTTAATCTCTATATTCTCTAATCCGAGTAANTATCCTTCATCGNTAGGAATATATATATCCTTCTAAAAGNGAGAGAGTTCTTTGAAACAGAGTTNTTTGTTTCGATGGGGAGGATTCTATGGCTACTTGGNGNGGGGATCGTTCTGTTCTTGGTTAGGATCGTGTTATTCAAAACCGGTTTGATTCA[C/T]ATGGTTAAGAAATGGAGGAGGACGATCGTCGATCTCTTTCACGTTTACCAGCACTACAANGTCCCNGAATTCAACGAAGTTCAAGAGAATCATCTCTACAGGAAAGTGTACACNTATCTGAACTCGTTAAGCTCCATCGAGGAT…	GTCCTCCTCCATTTCTTAACCATG	CGTCCTCCTCCATTTCTTAACCATA	GGATCGTGTTATTCAAAACCGGTTTGATT
37	A02_27237375	A02	27237375	G	A	CNU_11390	ATCAGATAAACCAAGCAACAAACAAAATCCAGTTTGGTTTGTTTAATTCCGGAAATCTTTGGTGATAGAGCTTTTAAGGTTTTTTTCTTATCTTTTTCTAGGGTTTCACATTTTATGCTACTGTTACCACAAAAATCTGTATTCCTTTTCACGGCTTCATGTTTATCACTCAGCATAATTTATTTTTACTAATATTTTGCGTATCTTGTAGAGATGGGGTGGTTTGTGAAGCTCCTTCTAGGGCTTTGGA[G/A]TAAGTCCGCCAATGGCGACTGGACTTTTGAAGAAACCTCTTCCTATCACGGAGAAACGGTGATAATAAACAAGACTGACACTTTTGATGGGTTGGTGGAATTGATACGTATAAGACTGAATCTGGGGATTCTAACGCCGGTTGC…	AGTCGCCATTGGCGGACTTAC	CAGTCGCCATTGGCGGACTTAT	GTTTGTGAAGCTCCTTCTAGGGCTT
38	A03_33509930	A03	33509930	T	G	CNU_11390	CGACCAAGGCCTGCAAAGTTCAATAGGGTTGGTTCAACAGAAAGTTAAGGCAAATACATAATATTGTCCACAAGCATCGGATAAAGGGAGTGCACGGAGGAGAAAGTAAAGTGTGTAAGCGAAACTCACGTGTTCTTTGGATCGCTTCCTGTGATTATACGCCAATCATCATACTCCAACGCAGGGTAACAAATCTTAAGAGGCATATTGCCAATAATGTCGTCCCATTTAGCTTCAATTAAGTTCAATA[T/G]AGCTTCATTCTGCTTCGGTGTACTCAAGGAGGAAACAACAGACCAGAAGTTCCCAAGGGTGAAGAATCTGAAATCCATGTGGGCGGGCTGTAGGTTCCCGAGGAGATACCCGCCCTGCTCGGGAATCCAGTCCATGAGCCATGG…	AGTACACCGAAGCAGAATGAAGCTA	ACACCGAAGCAGAATGAAGCTC	GTCGTCCCATTTAGCTTCAATTAAGTTCAA
39	A01_1402383	A01	1402383	G	A	CNU_11395	TGTTTCACCACTTCCACCAANCCCTTGTTGATCCATGTTGCCTTTAGTCACCGCCGCTTCTTGAGCGGCAGCAANCAACAAGNCAGCCGCAGCGACNGCTTTTTGNCGGGTTNNNTNATCCNNNTCACTAAGNCTCAGTGCGGGAAGGGCGAGAACGATTTCGCGCATCTCCCCTTCTTCTTCTTCATCGCTCCAGAGGTAATCACTTTCATCAGAATTTTCATTANTTTTTTCCTCAGTGNTCACTTTT[G/A]TTTTCTCGGGATCACTCATGATTTTGACTTTGTTGAGAGTAATAAGTTTTNCTGAGACCGAAATGNTGTTTATATAGTTTCTTTGATCACATGACGGTTATGACCGTTACCTCTTCCTGTGTCTAATGTCTATATCTCTCTATT…	AAAATCATGAGTGATCCCGAGAAAAC	CAAAATCATGAGTGATCCCGAGAAAAT	CTCCAGAGGTAATCACTTTCATCAGAATT
40	A04_15470374	A04	15470374	G	T	CNU_11395	ACACCAAAACAAAGGTAAAAACAATTCAAGCAATACACATATATTTTAGTACATAGTTGTTCAAAATAAAGACAAAGCATAATCAAGAATCATGGACACAATTATCAAGTTAAGCAAGACCTCATCGTTAATTCGTAGAAAGCTTGATCTCTTCCTTGAACTTGGCCATCGCATCCCTAGGAAGCGTTACCAGCACTCTAACACCACCGCTCATCCCTGGGTCCGCCTTTGACGCCGGCAATAAAACACA[G/T]AGATCAATTGTCATCGGAACCAAAGGTATAATGTTCACTAAACCTCCCCAACCATTGTACTGTAGACCGATTTGCCGCCAATCCGTGACGGTCAAAACCCCTTTGCCGATGCCTATCGTAGATGACATATCTTTCAGCCTTCTC…	TTGACGCCGGCAATAAAACACAG	CTTTGACGCCGGCAATAAAACACAT	GAACATTATACCTTTGGTTCCGATGACAA
41	A02_1182385	A02	1182385	G	T	CNU_11396	GATAATCTNTCTTTACTTTTTTCAGGGAGTGTCCATTTCAGAAATGTCAAAGTTGATTCNACCACATCATGTTGTTGCGTTGTGCTCGTTGATTGCTTCACTTCAGAGATGTACTGGCATTTGGAGGCTACAAGAGGTAAGTTTGATGGCTAATAAGTGCTTTTAACGATAGTGTATCAGTCTTTAACTATGTGATCCTCTGTATTGTTTCTCCAAAGGTGTTAGGCTGTTACAAGTGGCCTGAGTCTCA[G/T]GAATCTGATTTTGTCTACAGTAAGTGCGTTTCCAAAATAGCTATGGTAGACAAATACCTTATAGGGTGTTAAGTTTATAGATGTTTATCTTATAATAGGTGCATCATCGGTTGGAGGCTCAGTAACTGCAGGTTTTCAAGCTGA…	GTTACAAGTGGCCTGAGTCTCAG	GTTACAAGTGGCCTGAGTCTCAT	GAAACGCACTTACTGTAGACAAAATCAGAT
42	A07_25547320	A07	25547320	C	T	CNU_11396	TACAGAAGCGGTTGCATGCGATGAGCTTCCACATGNGAAGCTACTTTTGGCTTGACTTCCAGCAGCTCAATGACATTTACCGTTACAAGACGGAGGAGTACTCACACACCGCAGTTAACAAGTTCAACGTCATCCCCGACTCCATCCCGGACTGGGTCTTTGATTTCATGCCTCTCCAGGGTGGCTACTTCGTCGGTAACGTCAGTCCTGCCCGAATGGATTTCAGGTGGTTTGCGTTGGGAAACTGTAT[C/T]GCAATCCTTTCCTCATTGGCTACGCCTGAGCAGTCCATGGCTANCATGGATCTTATTGAGGCTCGGTGGGATGAACTGGTCGGAGAGATGCCGTTAAAGATATGTTATCCGGCGTTGGAGAGTCACGAGTGGCGCATTGTCACT…	GGTTTGCGTTGGGAAACTGTATC	GTGGTTTGCGTTGGGAAACTGTATT	AGGCGTAGCCAATGAGGAAAGGATT
43	A07_22876263	A07	22876263	A	G	CNU_11397	TTGGATGTGTTNTTATCTGTGCTTGCTTCTGACCAAACTCATGTTGCTAAGGGAATCGNACGGCTNCTGATGCCATCCTATTTTCCATCGAGAAAGAGAGCTGAGGAGGCCTGCACNCGNTGNAGGACACTCATNAACAGAAACCCANTNGCTGGTGCAAGGTTNTGCGAGTTTTTAGTATCTTTAGGAGCAACCCTTCAATCTGCACGNCAGCTGGTNGGATTCTTNTTGGATTCNATCTTGTCAGATG[A/G]TGATAAGCTAGAGGATAACCAGATTGAAGGCTTGCTTCTTGCTGCGTACCATCTCTGTAAAGATCTGGTTGCTGCTGATTCTGGGTGTATGGCCNCNCTTAAAGAGTTGTTACCTGGAGAAAAACTGAAAAGCTTGCTAGCTTT…	CAATCTGGTTATCCTCTAGCTTATCAT	AATCTGGTTATCCTCTAGCTTATCAC	TTTTAGTATCTTTAGGAGCAACCCTTCAAT
44	A08_6629206	A08	6629206	C	T	CNU_11397	GAGACCGTCAACCACCTACTCTTCGTGTGCCCACCTTCTGTTCAGGTATGGGCCCTTGCCCATATTCCTCACTCTNCGGGTCTCTTCCCGAGCACATCAAACCTAAGCAATCTCCACCACCTCCTCTGGCGGGCACAAGGACTTGGCATTCCATCCTCGATCCTAGATAATGTGCCCTGGATTCTGTGGTTTTTTTGGAAAGCTAGAAACGAATGTCTTTTTAACGGGATAGAAACCCCTCCTCTTGATA[C/T]AGTTCAANTAGCTCTATCGGAAGCAGACAATGGGAGGCTAGCGCAAATTCTACATACTTCTCCCGGCGATGAAGTAAACCTCCCACCAAANAGTGCTCAACCCCTCNGCCCCCAATGCTCGATTGATGCCTCATGGCACCAAGA…	GATAGAAACCCCTCCTCTTGATAC	GGATAGAAACCCCTCCTCTTGATAT	CCATTGTCTGCTTCCGATAGAGCTA
45	A05_12945933	A05	12945933	G	A	CNU_11400	GTATGTGGTAGTTTCCAAGATAAATATGATGTCTTCGTTGACAGACATAACATCTTGAGCGATTCCANCAATTTCCTTCCTAAAAAATCCAGCACNGTAAATATAACTTTCTTNTTTTCAATGCGAAGCATTAATTTTTTGGGAAACCTATCTTCCTTCATCACATATTCAAAGCTGGGTAGCTCAAACCCAAAGGTGTTTATCGAGTCAAGGATGATGCGGATAGCGAGATGGTCAGGAAGGCTTGTAA[G/A]AGAGGTGATGGAGATGTTAGAAGAGTACAAGAAGCTAGAAAAGATATGGAGCAAGATGAAAGCGCTCAAGATCCCAAATAATGTAGACATGAGTGCACTCTCGAAAACACATGAACGCTCAACACATCAGCAAGATCCTCCCTT…	CTTCTAACATCTCCATCACCTCTC	CTCTTCTAACATCTCCATCACCTCTT	CGAGATGGTCAGGAAGGCTTGTAA
46	A09_32875625	A09	32875625	G	T	CNU_11400	TTNGTTACAAGAAGATCAAATTTTACCGGTTTAGAGTTTGTGTTACACTTTTTGTTAATTTGGAAAAAAACTATATATGTGTATATATATATATATACANTTTTCTTTATTGTGGCAAAATACATTTTGTCTCTGTTTCAACATAATGCCTCATACGTTCTGTCAAATTGCATGAACCATTACGTACTAGNAGTATTGTTATATTTTAGAATTAAAAGCTATCATTTGAATGTAGGAGGTCATACGATAG[G/T]AAATTCGAGGTGCAAGAGCTTCCGAAAAAGGCTATACAACCATTCTGGAAATAGCGATCGCGACCAGACTTTGAATCAAAACTACGCCTCAATGTTGCAGCAGGGATGTCCTATTTCTGGTGACGACCAGAACCTCTTTGCTCT…	GAATGTAGGAGGTCATACGATAGG	TGAATGTAGGAGGTCATACGATAGT	TCGGAAGCTCTTGCACCTCGAATTT
47	A06_28145619	A06	28145619	C	A	CNU_11402	GTTGAGATCAAAACCGCTNATTCTTGAGCTGTTGTTAGAAGAACAATCAATCCCAGTGTAGTTAAACACCACTGAATCTGAGCCATTGATTCCACAAAGAAANGACATATAGTCTTCAAAACCTACAAATAATACATTTTGATGAATTGNTAAAAGAAAAAGTTTAGTTGTGTAATCCAATTTTTAAATATAAACTTACTAGTATCAAATATTAAACCAGGGTCTAAAGCTGCCGTGGCGTTCACGAAAC[C/A]GCTTCCCATATCAAACGGNGTTGCNTTAATNAGGCTTTGATCAGNATTGGCATAAGTACGCTGAGCCATTATGGGACCTCCTTTGTTATCATTAAGAAGAGCGGTTGTTGAAAGTGCAGATGCNATTGCNGAAGGACTAAAGTT…	GCCGTGGCGTTCACGAAACC	GCCGTGGCGTTCACGAAACA	GTCCCATAATGGCTCAGCGTACTTA
48	A09_18253675	A09	18253675	A	T	CNU_11402	TCGACATTGGGCATAACGGAGAACCTACATAATGCAATATATGGATGGGTTCTCTTTCAACAGGTATGCCTTTACGTCAATTGGTTTACTTATTGTTTAGTCATCTGCCTTTACATATATGGATGGGTTCTTTTTGCTGTTTGATTCTCGCTGCCGTTGCATGAAATGAATGTTGCATTTATAATTTATACCAGACGAGAGTTTAAGGGAGCCACAACATTTACTCCATTTCTGTGAAGTTTGTGAGCAC[A/T]GGTGAACCTTCTCTTCTAGGAAGCGCAATTCAGGAGTTACAGAAAGTTACTGAAGAGGGCAACCCGAAGGAAGATCTTTATTTAAGTCGTCTGGTATGTTCGAGGCAAACCATTGGAGCTGACATACACTTNAGTGTCTCCAAG…	TCCTAGAAGAGAAGGTTCACCT	CTTCCTAGAAGAGAAGGTTCACCA	AGCCACAACATTTACTCCATTTCTGTGAA
49	A02_14679128	A02	14679128	A	G	CNU_11403	TGGAAAAGCAAAAACAAATGTTGTGATTATGATATTCTTGATTATTTGGCAAATGTCATTCATATTTTTTTTTTCTAATAGAACGGTGTAACTCAAGCATCTAGCTACCTAGTGTGAATTCAAACAAAAGTCACTAAACATTTTGACTCGTGATATTAAATAAAATATGGAATATATCAAATGTTATTTATTTTTTTGTATAGTTAACAAATAATAAATTATATGTAGAATTAACAAATAATCTTATCCG[A/G]TACAAAATAAATAGTGTCGAATACTCATTGAGAAATATTGATTTCAAATGTGATACAGCATAATTGTTACTAGATTTTAGTTAGTTAATTTCACCTAAATAAATCCAGTTATACGTCAGAGGAATCTGTAACTTCTGGAGTCAT…	TATATGTAGAATTAACAAATAATCTTATCCGA	ATATGTAGAATTAACAAATAATCTTATCCGG	CAATATTTCTCAATGAGTATTCGACACTAT
50	A10_20676481	A10	20676481	C	T	CNU_11403	TCTCTTTCCGAACAAATCAGCTGGTGATATCCATGTCATGACGAAGTTGACTTCGCATCCAGAATCTCCGACAAACTCATTGGCCTTCCTTTGAAACTTGTCAGACAAGTTATCTCCACTGAACATCTCGATAAGTGCTAGGATCTTTTTGTTTACAGTAGTGATGTTCGGGTTAGGAGAAGTCATCGCCACTTGCTTGCTTTTACTTTCGTTCTCGGAGCTCAGAGGTAAGTGTGGCAGTGGAATCACT[C/T]TCTTGATCTCTATCTTCACCTCCGAGAAATCTCTCTGCGGTTGCATCGAGAAATTAGACATTAGAACCAACGTGGTAACCGCGATCAGAGTTATAAAGCTGAACGCAAACGCGGTGAAAAGTGATGATTGGTTCAGTCGTCGGT…	GGAGGTGAAGATAGAGATCAAGAG	CGGAGGTGAAGATAGAGATCAAGAA	TCAGAGGTAAGTGTGGCAGTGGAAT
51	A02_27401105	A02	27401105	G	A	CNU_11405	GTGTTTTCCAAATANTAGTTAGATATGAGGAAGCTNTCAANCCCTTGCTTGTTGGAGATAGAAACCACTTAACGAAAATATAATGAAAACTTTCCAATCTAGTCATGGGGGCAAAGACTTACACAGAAATCAGAGAAACTGGAACAGAAAGCTTCNTCAAATCCTTGAACCATTTTCTCTACATACGTTGGNCTAGTAGAGCAAACTTCTGAAGTTGCTTCTAATATCATTGGATGTGGAAGAGAACAAT[G/A]ACTAGAGCGAACNAGCGANACCAAATTTTCNACAACTATACCCATGTAGCTCATAGCCTTTTCACTCTCATGATACTGATCAATAAATGAACCCATGCAGACNAGCGCTTTCAATGCCAATTCCCACTTCACTGTTTTGGCACT…	ATCATTGGATGTGGAAGAGAACAATG	AATATCATTGGATGTGGAAGAGAACAATA	AAAAGGCTATGAGCTACATGGGTATAGTT
52	A10_298594	A10	298594	C	T	CNU_11405	CATCGGTGGAGCTGACAAGGGATGAGCAGATGATTACAGTGTCAGAGAAAGAGGTGAAAAATGAAATTTCTGCGGATGCAGAGTCTAGCAAACCTCAAGGCAAAGAAGAGATCGAAGTAGAGTTACAATCATCTGAAGTGGAATTCAAAGGGAACAATTTGAACGGAAATGAAGAATCTGGTGGGGGCATTCAGGTGGAAGAACCAGTACTTGAAGATAAGGAAGGTGTAACAGATATGATTCATTCCAA[C/T]ACAGAGCAAGAAGTGAAAGATCAGCTGGCCGCTGATTCCGATGATCTGAAGGAAAAACTGGGAATCTCTGCTACAGACTCCAGCGACGCCCCGCGAGAGTTACTGTTACCTAACAAGAAGCTATCAGCTTCAGCTGTTCCATTC…	GATCTTTCACTTCTTGCTCTGTG	GCTGATCTTTCACTTCTTGCTCTGTA	GGAAGGTGTAACAGATATGATTCATTCCAA
53	A02_3479697	A02	3479697	G	A	CNU_11406	ATTGTTTTCTCAATATCCTTATCCCCAAGATAGGCTCTGAGTTTAGCCGGTGCCGTTGTCCACTCCTCTTCGCTCTTCCCACGTAGAGCCGAACCCAAGACCTTAAGACCAAGTGGAAAAGGTGCAATAAGCTTAGATACTTCAACAGCATGCTTAAAGTATCCTCTGGGCGGAGAGCTTTGCCCAAACGCAGAGTATGAAAAGATCTGTAGAGCCTCTTCGCTCGATGGGTAAGGAACTTTGTATATCT[G/A]CTCTATACCATTATGAGTAAATGTTTCTATATCTTTATTCACCACAATCACCTTACTTCCGAATAAAAGACTCCGAAATAGATTTTGCAAAACTTGTAGATGCTGGGAAGCGACATCATCAAGAACAAGAAGTACTCTCTGGCG…	AGAAACATTTACTCATAATGGTATAGAGC	ATATAGAAACATTTACTCATAATGGTATAGAGT	CGCTCGATGGGTAAGGAACTTTGTA
54	A02_23925969	A02	23925969	G	A	CNU_11406	TAGGAAGCGATTCAAAGGCCAAGAAAGATATAGTACACCAAAGTTATTGGTAAGGCTATTAGCATTCCAAAAATAACCCTGCATCCATTTCACCACCACAACATGTGTTATTTTGGGTCCTCTATATGTAACATATTTGACCAAAAATTAATATAAATGAATAGGTTTTGGAACTTACGCAGTGCTGAGAATCGTGGGATGCACATTGTACTCTTTTGCAAACACAAACGGAACTATTCCTTGAGGTAAC[G/A]CAGCCTATATATACTCAACATCATCACCATGATTTAGGGGAAAAAAAAATATCATCGCCATGATGTATCATATTATAAACCTTAAACATATCATGGATCATACAACTGAACAACAACAAAATCTTTGTTTATACCTGAACGATG…	AACGGAACTATTCCTTGAGGTAACG	AAACGGAACTATTCCTTGAGGTAACA	CCCTAAATCATGGTGATGATGTTGAGTAT
55	A04_15470622	A04	15470622	C	T	CNU_11407	CAGAGATCAATTGTCATCGGAACCAAAGGTATAATGTTCACTAAACCTCCCCAACCATTGTACTGTAGACCGATTTGCCGCCAATCCGTGACGGTCAAAACCCCTTTGCCGATGCCTATCGTAGATGACATATCTTTCAGCCTTCTCTCAATCTCGCAAAGNTTCCCAAAGACGTACCGCTTGTCTAGCGCCGCTCTCTTCATGTCTTTTATGAGCCTCACGACACGAGACAACGAAGATTTAGTCAGCT[C/T]GTTTGCTGTCATTGCTACAGAGCCGCTGATCAAGGCATTGCCATAGTAACCTTCTGGTAATGGGGGCTCTATAAAGCTGCGGATGCCAATGGCCATACCCAAAACAACCGCCTCATCTGGACTCATCTTCAGGGCTCGGCATCG…	GAGACAACGAAGATTTAGTCAGCTC	CGAGACAACGAAGATTTAGTCAGCTT	CGGCTCTGTAGCAATGACAGCAAA
56	A06_21293592	A06	21293592	T	A	CNU_11407	ATAAGATATAATAAAGCATCATCNTTCCAAATATCTCTAATANNTAAAGAAGAAGAAGNAAAAATCAACAAGATAGAGTTCTTTCTTCTCACTTTGCTCTCATTCTCACTAGTGACACTGGGAGTCTCCCAAGCAAGCATCATATCAAACATGAGCTGACGAAACTCTTGATCGCTTAAGTAATTAGGCTGCTTCATTACTTGATGTAGAGCCTGAAACGAGCAGAACTCGAGAAAGTTCCTCGCGTACG[T/A]CAAGAGCTGCTTAACACTCTCAGGCAACTCTACATCAAATCGGTGCTGCAAATCTTGCGTTGGAATCTTGAGGATACTGTGAACAATNGNCAGCACGAAAACAAATCCTAAATCAATCANTTAAAAGATGCAATCGCCAGTATA…	CGAGAAAGTTCCTCGCGTACGT	CGAGAAAGTTCCTCGCGTACGA	TGCCTGAGAGTGTTAAGCAGCTCTT
57	A07_20012970	A07	20012970	G	A	CNU_11411	AAACGCTTCTGATGTTAAACCTGTGCATAACTACTCTATACAGACAGGGGAGGAGTTTTCTCTCGAGTTCATGCGTGAACGGGTGATTCCTCAGAGATCTTCCAACCCCAATGGAGCTGGAGACATGAATCACAACAATACTACAGGTTATATGGAGCTTAGAGGTTTGCTAGGGATAAGTCACGCAGGATCAGACTGTGCTTCAGATGTCTCCAGGCTCAGCGTTGCGGAGAATGGCTTGAGGGATTAC[G/A]ACAGAACAAACCCTCCGCTTCACGAGTTTGATAATAAGCTTGGTCATGTCCAGTCAGCGCCGCAAGGTTCGATTAGTAAGGATAGAAGTCTAGGAAATTTAAATGGGTACGCAGCTTCTTCAGCCTCTGGTAGTGTAACAGCGA…	GAGAATGGCTTGAGGGATTACG	GAGAATGGCTTGAGGGATTACA	TCAAACTCGTGAAGCGGAGG
58	A09_37233481	A09	37233481	C	T	CNU_11411	AAGGTTACCACGGTGAGGTCTCAATCATGGCGTTTGGTGACAGGAACCAGATCCCTGGTTACTACGAATCTGCCGGAATCCAAATCTTTCCCAAAGGTTAATAACCTTTTCTTCATTATTTTATTTTATTTGTAGATTGATAAGTTTATGGTTTCAGGAGATAAGTATGAGAGGATTGGTCAGATGCAGTTAGAGTTTTTCGGGTGGATGAGGGATAATAGTTGTGAGTACACCAACATGATGGTGGTGA[C/T]ACGATCCGCAATGGAGTTGGTTTCTTATCTCGAGTATAGAAACACGCACCACAACATTCTCTTCGCGAATCCTCTGAACCCGCAAACGAAGGCTTGCGGCTGCAAATTCGGAGCTAGGCAAGAGGATCCTAGCGCTGAGACATG…	CACCAACATGATGGTGGTGAC	CACCAACATGATGGTGGTGAT	GAGAATGTTGTGGTGCGTGT
59	A07_21781162	A07	21781162	C	G	CNU_11412	TTCCCACCAGGAGGCATCAGTGGTCCTGAGTAAATGATTCTGTTTTTCATTGGCGCGTTTCCCTGTCACGGAACATAATAACTCAACACTTACATACCAAAAGGTTAAGACCCATAGAATAACTAGAAATGAAATAGTGAGGCTTACGGTTGAGTAATCTCTGTTAGAACCGCTCCTACAAGAATCACCAGACAAGTTTCCTGTCTGTACTATCCTAGACTTCATCTCTGCATTAGTTTGCCTCTTGATG[C/G]TTCCTCCTCTGTTCCATTCAGTATCAGAAACACTTGGGTGAACCACTGAAGAAGCCTGAGCGTAGCCGTTCTGGTGAAACCCCTCTCTTCTGGGTGGTTCGATCCTAAACCCGGTTCCACCTTCCTCGTCAGTTTTAAACTTAT…	TGCATTAGTTTGCCTCTTGATGC	TGCATTAGTTTGCCTCTTGATGG	AGGCTTCTTCAGTGGTTCACC
60	A09_42427036	A09	42427036	C	G	CNU_11412	GACTCTTCGTTTCCAGCGAAGAGGAAATCGGATCTCTGTTGCCAAGAGCAGGATAATGTGGCGAACAAGGCTCAGAAGCTTAATCCTTCGTCGAGTTCTACTGATTCTGAGTCAAAAGATGAGAACGGCGTGCCCGGCGATCGTACAGCTGGAGAGAAGCAAGACGATGGAGTTGGAGATGAAGAAGAGGAAGAAGAGGAGGAGGAGGATTCGATTGAAGTTGAGATCGACAGGAAAGGTAAAGGCATAT[C/G]GAGAGAGGACAAAGGAAAAGGAAAATTGATCGAAGTTGATGAAAGTGACGATAGCGATGATGATGACGACGACGACGACGAGGATGGTGATGAGTACGACGAAAGCGATTTGTCTGATGATCCATTGGCGGAGGTGGATTTGGA…	CGACAGGAAAGGTAAAGGCATATC	CGACAGGAAAGGTAAAGGCATATG	CGCTATCGTCACTTTCATCAACT
61	A01_7153147	A01	7153147	G	T	CNU_11416	ACATGTCTACTGATCCAAAGAAATCATGAGTACAAATAGGAAACTCAATAAATCAACCAGTAAGCAGTTCATCTTGTACCTTCTATAACCGAATCTACAGGCAGGAGAGTGGCGACCGGTTGACTTTTCAAGTTGAGGCGTGATATGAGCACCCAGGCACAAACAGGTGAACGGATTTGCATTAGCTCCTGTAACAATTGACAGAAAGCGCCTCCAAGCAAACTAATGCATACGATTGTTGAGCTTGGGA[G/T]ATTGTTAAAGAATTCTTCAGCAAAGTGTACAAGATCTTGAGTACGCTCCGGAGCAAGCCTACAGTGGCAAGGAAGAAAGAAAATAGAGTAAGCCAACAGAAAAGTATACAGCATGTCTAGTTGCTTAAGGTAACTCATCTCATA…	ACACTTTGCTGAAGAATTCTTTAACAATC	GTACACTTTGCTGAAGAATTCTTTAACAATA	GCAAACTAATGCATACGATTGTTGAGCTT
62	A08_10824978	A08	10824978	C	G	CNU_11416	TGTTCAAGTCGAAGAAACCTAAATCAAGAAGAGATCTCAAGAAAGAAAACAAAGACAAAAGAGGAAGAGAACTATTACAAAAGTCAGCTCCAGANTTATCAACAACAAGAAAGAACCAAACGTCGTCNACTTCGTTAANTCTCCCAACACCAAGATCTCTGCCGTCTCCAACAAGTATAAGAGACTTGTACACAGAAAGGCAGCAAAATCGAAACCTGAGGGTTTTCTCTTACAAGGAACTCAGTGAAGC[C/G]ACGTGTGGGTTTGACAGAAAGTTTCAGATAGGNGAAGGTGGGTTTGGTAATGTTTATAAAGCCACCATTAANAATCCCACCAATGGAGATTCTCATTNTATTCCACATACCGTCGCCGTCAAGAGACTCAAAAAACANAGTCAA…	AAACTTTCTGTCAAACCCACACGTG	AAACTTTCTGTCAAACCCACACGTC	GGTTTTCTCTTACAAGGAACTCAGTGAA
63	A01_9438779	A01	9438779	A	G	CNU_11419	CATTGTGCAGAAAGGGGAGCTCAGGGACCACAAGTCAATTGTGGCTTTTAAAACCTTGGTTGAAACGCTTCTCTTGGAATTCAGAGGCAAGTTGGAGCTTTGTGTTGGTACTCAAAGTTACGCGCNGCTTCTACAACCATCACAAGTAATTCATGCTTTGTTGAGGTTTATATCACCTTTTAAACTTTTAAATCTTGCTCGTTCCATGCTGGTTGATGTGGAAGAATTGGCAAGCCCAAATTTGAGTAAG[A/G]TTGTCAGTTTGGGACTGGATATTGCTGGCGGGGCTTTCGAAATGCTTACATTGTATTCACAGCAGACGGCTGCTAAGAGAAAGATATATGATNTGTTGTGGGATTTAGAAGAAAAGAATTATGACAGTAACCTCCTTGAGGAAG…	AATTGGCAAGCCCAAATTTGAGTAAGA	GGCAAGCCCAAATTTGAGTAAGG	CAGCAATATCCAGTCCCAAACTGACAA
64	A03_16231493	A03	16231493	T	G	CNU_11419	TCTCAGTAGTTTTATGGACAAACATTCACTGAAACAACAATTGCAAAAAATTACAGCACATTACAGCTTAAAGAACTTAACAGCCAAAGGCAAGCAATCAAAGAATATGAACTTACAGTTACTGTGATTTCATGCTGTTTTCGGTAACTATCAACAGGCGAAAGATGGGGACCATCAGGAGTTGTTNCAAAATGAGGCCTTCCTNCGGTTGGAAAAGCTGGACCAGCNTGTCCGTATGGTCCATGCCCTG[T/G]CTGCCCCATGGCCGGATCAGCATGTGCAGGTGGACCGCCACCTATCCTTATATCCTGCATATTATTTTAAAANGGTTCTTTACCTGAGAAANGACTCNGAGGCAAAGATATTTCACAAGATAAAAAAGANAGGAGAAAGTGATN…	CCGTATGGTCCATGCCCTGT	CCGTATGGTCCATGCCCTGG	CTGCACATGCTGATCCGGCCAT
65	A06_5292010	A06	5292010	C	T	CNU_11420	TTCCTCTTTGATTGTTTTCAGAATCTGACCCCCAAAATCGCATAAAGTTTCGTACTTTGGAAGGGGGCTTTGCTGGAGAATTTAGGGATCTCTCTCTAAGGTTCGTGATTCTTTGTTGTTACCTAGATTGTGAAGTTAGTAAATGAGATTTGTTATTNTTCTAGGTATTGAGTTATGTGGAAACAGATCATAAGTAAGCTTCCTAAGAAGTCATCTAAGAACCATTCTTCATCTAATGCAACTGCATCTA[C/T]TTCCAAGAGTAGTAGTAGTAGTGACAATGTTACCGGAAAGTCTCACGCCAAGAACGCTGCAAAGCCNCCTGCTGCTTCTCCTCCTGATCCAGGGCCCAAAGATGGCAACTTTAAGCAGGGAAACGGGATCTATGAAGCCTTGCC…	GTCACTACTACTACTACTCTTGGAAG	GTCACTACTACTACTACTCTTGGAAA	CCATTCTTCATCTAATGCAACTGCATCTA
66	A07_24053208	A07	24053208	T	C	CNU_11420	ACTGCCAGNTACTGCAAACACAAGCCTAGCNCGACTGAAGGTTTGTCNCGTGAAAGATCCTTGGATTGTAAGANGTGCAGTTCCATGGGAGATTCTCTGTTTAGCTCTTCCGTTGTNGGCNGGAGGAAGCGTAATCGAATTGTNAGTTGCTGNCCCCACAAGCCTAGCNTNACTGATGGTTTCTCNTGTGAAAAGCCCTTGGACTGTGAGAACGGCAAGTTCATGGGAGACTCCGTGTTCGGCTCCTCGG[T/C]TGGGCAGCCTTTGACNGGNCTAGTAATGTCAAGATGATGATCAGCTTTGGGGATTGGAGTGTGTGTGTTTCGTCTTGTGAGGTACATATGGGGCATTTGCTTAATGCGGTGTTGGTGTTGGGTTTTAGATTATTGTGACTCGCA…	CCGTGTTCGGCTCCTCGGT	CGTGTTCGGCTCCTCGGC	CCCAAAGCTGATCATCATCTTGACATTA
67	A10_10213512	A10	10213512	G	T	CNU_11471	TTTGAGTTTTGACACATATAGATAGGCGTTAAATACCTAAATACCTAAATGGGCCTTCACCCATCTATGGTCTTACAAAAGTATTGTTTTTGATCTGGATTAGCATCCCACATCGCTGCATTGGCGAAGAAACTCGTAGTATATGTTAGGCTGAACGAGCGATGATGGTCACGACCTTACTTGAACAGGACCCGTTCTATAGGCCGTACCTCTGTGTTCTTGATCTTAAAGAGACAAGCCCTTAACCCTG[G/T]TTGATGGTNCATGGCCGTGCGATTAGAGCGTGATTAACGGCTGCGACCATCGTAGGATGTGTTCGGTGCTGTAGAGGATCGTTACTCGGCTCGATTCTATCCTTGCCGGGGTGGTTGCACGGCAGTCTGACAGGCTATCCTTTT…	AGAGACAAGCCCTTAACCCTGG	AAAGAGACAAGCCCTTAACCCTGT	CACGCTCTAATCGCACGGCCAT
68	A10_11668477	A10	11668477	C	G	CNU_11471	GTATATTCATTGTCNCANTTGTCCCCATGAAAAAGACAGTTACATGATTGACCTCTGGTTGNTTAACAATTGTTTGTAATACTATTCTATTTACGATATATGTTAATATCTATCATTTTANTAACTTTGGTCGTACCAGGATGGTGGAAACGTTAACCAGTCTGCNTTTTGCTGTGGANTTGCTTCTGAATTTTCCTGCCAAGTTTAGACATTTGTAATTATAACTGACCTTATTGTAATATGCCAAACA[C/G]GGATCAATAATCACATAGNCATAGCTTATACACCTATCTCGAAATTAATTGATTAAATATTTTATTAGAAGCTTACCTCTTCTGTGCAAGTAGATGTGCAACCCATGATTAAGTCTTCTAATCCCGAACCAGATGATCGACCCC…	GACCTTATTGTAATATGCCAAACAC	CTGACCTTATTGTAATATGCCAAACAG	CAATTAATTTCGAGATAGGTGTATAAGCTA
69	A06_8498897	A06	8498897	G	T	CNU_11472	GTATCATAATCCATGCAGCCCGATANTTAGGACTAAAATCGATTGTACCGGCATATTTGGAACCCAACGTAAAACTAGAAGAACTTCTCACTGGCGTATCATTTGCTTCGGGTGGTAGTGGCTATCACCATTTAACAGCCAAAATATCAGTAAGATCAAAACNGCCCCCTCTAGATNTTAATTTTATATATCTAGCTCTTAGACTAATGATCATTCATCAAAATATAACCAGAGAGTAAGGTCAATGTTG[G/T]AGCAGTTGACATATTTCGAACAATACATAGCGAGAGCAAAGAGGTTAGTAGGGAAAGATAANACTGATCACTTATTAGCCAAGGGCTTAGCCATTGTGGTCGCAGGCAACAACGATCTGCTTATTACATACTATGGTCAAGGTG…	AACCAGAGAGTAAGGTCAATGTTGG	ATAACCAGAGAGTAAGGTCAATGTTGT	CTTTGCTCTCGCTATGTATTGTTCGAAAT
70	A06_17779964	A06	17779964	T	C	CNU_11472	TCAGCCATCTCATTATACACATCCCAAAACAAATCAAGACGATTCCTCTTCAAAAACGCATCCAACAAAACGTTACATCTTGACGAATCAAGAACCAAATCCTTAGTGTTTGTAATCACAAAAGCAGCTTCGTCTAAAAACCCTTTNTCAATATACACATCAATCAAGATCCCATACACAACTCCGCCGCCATCACTCAACTCTCGCGAACATCTCGCAACCGAGCTCAAAACCTCAGATACAGGCCACT[T/C]CCTCTCAATCATCCTGATTNCAACACTACGAGCTTGCCCTAAACTACCGAAGCTACACAAACCTAAAGCGAGAAACGAAAACGAATCAAGTTTCTGCTCCGTNACCTTCTGAGAATCCACCCAATTGAAGAAGCTCAGAAGCTT…	CAAAACCTCAGATACAGGCCACTT	AAAACCTCAGATACAGGCCACTC	GTAGTTTAGGGCAAGCTCGTAGTGTT
71	A02_1789870	A02	1789870	C	T	CNU_11474	CGTCNACAACTTCACTTGAGGTTTCACANTNCTCNTGTTTTCGCCNCANCTCATCATTGTGAAANTCTANTAGTTTCTCTATATTGTCGCGTATCTTAATAAACTCTTGATGTTTTCGTCTCATTTCATCGTTTTGACATTCAAGAAGCTTCTCTAGATCGTTCCTTAGATCCACTATCTTGTGAATCTCTTCTCTACCAGTACTAATAAGATGTAGGAGATAACAGCTCACTCCAATGTTAAACAAAAG[C/T]TCCCTTCCTTTCATTTCTAAAAAACAAAAAATAATAATAATAATCAAAACTACAATTGAGAGACATAACTTTAAAAAATGTTTTTAGAACCAAAAAAAAACATTTCAAACATTATATTATACACACTAACGTTACCTATCAGCA…	TTTGTTTTTTAGAAATGAAAGGAAGGGAG	TTTTGTTTTTTAGAAATGAAAGGAAGGGAA	AGGAGATAACAGCTCACTCCAATGTTAAA
72	A05_14912857	A05	14912857	C	T	CNU_11474	AGCTTNNTTCATTGGTGAAGGGTTTNGACGATGGAGGAAAACTGCATGGTNTTAAGTGGTGATTGGGTTTGTAGCGATGTNGGNACGTGGGATTTTGTTATCGAGAAAAACAGGATGGGTCGTATGGTTGANATTTACGANGGNATTGGGTGCAAGGAGCTTGNGGGGAATGTTCTGCGTGAGTTTAAACTCGATGAGGNGCGNTACNGTGTGNCTTTAAGNTACTGGCCACCNACAAGCTTCGAACTTG[C/T]GACCGGGATTAGGACCCCACCGGTTNTGATAACTAACCATGGTGCGGTGAAGTATTTCTGCGANCATCAGAAAGTNAAAGGGGGGATGAATCTGTTTGCAAAGTTTGAACTGGAAAACAGATAGCGTGGACANTGAGGTTGTGG…	GGGGTCCTAATCCCGGTCG	GTGGGGTCCTAATCCCGGTCA	GAATGTTCTGCGTGAGTTTAAACTCGAT
73	A02_15749847	A02	15749847	C	T	CNU_11476	ATATGAGGGTCTTTTTGAGAGGATTGTAAACGGGTTGTCCNTATCTTGTAAATCAAGCCCACTTCCTGTAGATTCCTTCACGTTCATCTTCCCGGTTTGTTTCTTATCATTTCTGTTGACATTATATATTAACTTGTATTTCTTGTCACTGAATGAGCTCGGCTTTTTGTCTTGTCAGATACTGGAGCGAATTTTACTGTCATCAAAGCGGACAACACTTCACGATGATGTGCTTCGCATTCTGTACATG[C/T]ATCTAGATCCAATGCTGCCACTTCCAAGACTCCGGATGATATCAGTTTAGTGACTTGAGCCCTATCTGTTTTTACACTGTTATAGCTTTTATTGAATATTTAATTGTTCTCATATCTTTTCATGTCTGATCAATATTNTCAGGT…	ATGTGCTTCGCATTCTGTACATGC	GATGTGCTTCGCATTCTGTACATGT	GGAAGTGGCAGCATTGGATCTAGAT
74	A03_21094882	A03	21094882	G	A	CNU_11476	CCTTCCGAAAATTTNGGTGTGCTTCAAGACGAGTGAGTCAAAAGTGATCAGAAATCACTATTGCCTTGTTTCTTCTTTTTTTCACCAATCACTCATGTTTATTCAGTAATTTGTAAAATAAGTACGAGTTCCCCTTACTGTTGTATTGATTAGATTCAAAACAAGAAGAATATGTATTCACAAATGTTTTGGGTTTGAGAAACAGAGAGAGAAGAAGGAATGCAAACTGACCAGTATGGAGGGTATCCAG[G/A]AAGAGGGTACGGAGGATACCCCGGTGGTGGATATGGGGGAAACCGNGGTGGNGGATATGGNGGAAACCGCGGTGGTGGATACGGTGGTAGGGGCGGATACGGAGGNCGTGGAAGAGGATACTGTCGCTATGGTTGTTGCTACAG…	GGTATCCTCCGTACCCTCTTC	GGGTATCCTCCGTACCCTCTTT	GCAAACTGACCAGTATGGAGGGTAT
75	A05_11894779	A05	11894779	C	T	CNU_11477	ATGTTTGAGTAGTTAGTAGGAAAAGTTTTCTATGTGAAACTGGGTATATCATAATCAATTTGATATTAGTAGATTAGCCTGTGAGAACTTGNTAAGATTCCTATACAAACTGTATCTGTCACATTATATCTTATCTTCTGTAGCCATTCAAATTTTGTTTTGTTACGCAGTTACTATTTGCTTTGTTTGCAGTTNTTTAGCGACATAAAGAAGAGCTTGAAACGGTGCAGTGTTCTCACTAAGAACCAGA[C/T]TTTATTCAATTTGTTCAAGGTACATTTTTCATTCGTCGATATGNATTTTATATATTACNGGGTATTCGGGCAATGTTTTATTTTTTATAAGAACCAGCTTTGTTTGTGGAGTATCATAATTTTTATTTGGANAAACCTTGTCGT…	CAGTGTTCTCACTAAGAACCAGAC	GCAGTGTTCTCACTAAGAACCAGAT	CGACGAATGAAAAATGTACCTTGAACAAAT
76	A09_29809329	A09	29809329	C	A	CNU_11477	ACCATCCAACAAGAGCGCCTCATCGATTGGTCCACTTGCAAACTTGAGCTCCTTCTACCAGGCTCCTGAAGCNATGAAGGCAACGGTGAAGCCGTCTCAGAAATGGGANGTGTACTCATTCGGAGTCATCTTGCTGGAGATGATAACGGGAAGGTTACCGATTGTTTTTGTTGGTAAGATGGAGATGGAGATAGTGAAGTGGATACAGATGTGTATCGATGAGAAGAAAGAGATGTCAGACATTTTGGAT[C/A]CNTATTTGGTGCCTGAAGACACAGAGATTGAAGAAGAGGTCATTGCTGTGCTAAAGGTTGCAATGGCTTGTGTTAGTATTAGTCCCGAGAAACGACCAGCGATGAAGCATGTCGCTGATGCTTTGAACCAGATTTTCCTTCAGT…	AGAAAGAGATGTCAGACATTTTGGATC	GAAGAAAGAGATGTCAGACATTTTGGATA	CAATCTCTGTGTCTTCAGGCACCAA
77	A03_21060850	A03	21060850	A	C	CNU_11479	GACGCCAGACTTCCGAAACAGTTAGATCAGGCTCAACTGCAAAACAATGTATGTCACAGTCCGTTAACATGAAAAATTGACAGCAAGACTCTCTAGGCGATCCTTGCGAAAACCGCCAGACCAGAGACCTCGGGTAACCTTCACTCACGGAGGAAGAGCTGACGTCCAAGTGTATTTGATTACTTTTAATGCCTGTAGGGCTACAAGTAAACTGCCACAGCTCGCCGCTGGAACTGCACGCGACAGCAAC[A/C]CAAATGCGCTCCGTTGCATCAACCGAGGCAGTAATCAAAGCATTAAGATCACTATATCCTGATCTATTGCCTCTTATCCCATTGCTTTGTCGCGAGCTTTTCCTAACCTTAGGAGAACTATACACACCAGTATCGTCAAAAGAT…	CTGCACGCGACAGCAACA	CTGCACGCGACAGCAACC	TACTGCCTCGGTTGATGCAA
78	A06_3079806	A06	3079806	A	G	CNU_11479	GTGGGAGTCAGATTAGTCCGTTTAACACTCCTTCCAAACAGATGGGTACACCGTCAATGTATCTTGTACCTTCCAGCTCACCAGCTTCTTCTAACCGAGCTTCGTCTGGTCAGGATAAGGCTGTTTCTAGTCCTTGGTCTGGTAGACGAAGTTCTGCAAGAGACATTGCTACAGAGGAGCAGCTTGAGCAGCTTTTGGCAGAAGTAGATGAGAAAATCACTGAGTCAGCTGGGAAGGTGCGGACTCCTCC[A/G]CCAACAGTAGGGAGTTTTGCCATGGCTAGTCCGAGTCCTGTTGGTGGTTCAGCTGGTTTGTCTGGGACTACTAGGAGTACACCACTAAGAGCTGTTAGGATGTCTCCTGGTGCTCAGAAATTTACGACTCCACCAAAGAAAGGA…	AAGGTGCGGACTCCTCCA	AAGGTGCGGACTCCTCCG	ACAGGACTCGGACTAGCCAT
79	A02_15635917	A02	15635917	C	T	CNU_11480	CATTTAGAGANGNTAGACANTAGTTGTGTGANAAGTTCANGACATTCCAAGCATTCNTATTCCTCTCANGATCCATTTTAGATACTGAAACAACAGGGTTNTCATGNCAGAATAAACCCTGCAATGCCTTTTTGACAGTGAGGCTAGTTTTTCCGTCCTTCACACCAGTAAGATAACATGCACTCTGGTGTTCTGATTTGGCCTCCATAGCTCTTTTCTCTTGCACGGCACCGACCAACAACTTATACCA[C/T]ATTCGCTCTGAGCACGTGAGCACTGGAAGATCTTTGTCAACCATGCCACTCTCCAGCTCTCCACTTATATATGATGCTAAAGTTGGAGAAATCTCCCATTCATCCGCCTCATCTTTCCACAGATATCTAGAGACGTGATCACCA…	CACGTGCTCAGAGCGAATG	GCTCACGTGCTCAGAGCGAATA	GCACGGCACCGACCAACAACTT
80	A03_10121108	A03	10121108	G	A	CNU_11480	GAGACAAGAAAGAAGCTCACAGCAAAGGGACATATTCCTCAAGAAGGATACATCTTAGAGTATCTTCCAGTCCCGCCTAACTGTCTGTCAGTGCCAGAAGTTTCTGATGGTTCCAACTCCATGTCAGTGGTAAGGCCGTCGAAACCAAAATGCTTTCTTGAGTTCATTGATTACTTTTGGCTTGTTTACAAACTAACCCGGAATGTATGCCATTCTTTTTTTTCAGGATCCGTCTAGAATCGAGCTAAAA[G/A]ACGTTCTCAGGAAAGTGGTAGCGATCAACAACTCTAGGTCTGGTGAGACGAACTTTGAGTCGCATAGAGCTGAAGCCAATGAAATGTTTAGAGTGGTGGATACCTATCTTCAGGTGAGGGGTACTGCAAAGCCAACAAGAAACA…	TCCGTCTAGAATCGAGCTAAAAG	TCCGTCTAGAATCGAGCTAAAAA	TCGTCTCACCAGACCTAGAGT
81	A04_2921654	A04	2921654	G	T	CNU_11716	CCCTCACAGGTCCAAACCTCTCAAAGGGAACACGAAGCTCTTCTGGTCTACAAAAAAAAATCAAAAATCAAGAAAGTCTCTCAAANACATAANTTAATATGAAAGAAGAACAAACCTGCAATCGAGAGGAATGTTGCGAACCAAGAGACTTCCATGGCTAGATCCCTTACGTCCNCCACCACCGTATCCACGTCGGGAAGGAGGAGGAGGAGGAGGGCTTCTNCCGCGACCACCGTATCCTCGCCTCGGA[G/T]GACTGTAATAAGGCGGGCTGTATCTCCTACTCATCACTACAACAAATCGATTTCAAACGACAGATCAAAGATTAAAGAGTGAATCTTGGAATTGCGATCGGAGGATTTACCTGCGACGGAGACAGATCTGAAGTGAACCCTAAA…	CCGTATCCTCGCCTCGGAG	CACCGTATCCTCGCCTCGGAT	GTAGGAGATACAGCCCGCCTTATTA
82	A09_7042531	A09	7042531	C	T	CNU_11716	GCCTGTAAGAAACTTGAGTGGGTGTTCAGGGTGAGAAGTNNGATATTCTTCTAGAGAGATCTTGGTANATTTCACATGGAAGAACAACTCGCACTGATGGCACTCGTAATATTGCTTGAATTCAAGAACTTCAGAGCTGCACACTTTGCAGTTTCTTGTACTTTGAGACAACTCAGACCCCACTCCATTAGAGAGTACAAGCTGATGCTCATGCGTGTNGGTGTTTTCGAGAGTAAGGGGTGGTGATGGT[C/T]TCCACGCACAACCCAAATCCAACTTGAAATCGCATATGGAACAGAAGTAACCAGTGTCAAACCAAACTTGACACAGACTACAAATGGATGATTGGAATTTTCGGACAAGCTTGAGAGGATGATCAGGATGGGAAGAGTGGTTGA…	GGATTTGGGTTGTGCGTGGAG	GGATTTGGGTTGTGCGTGGAA	GTTTTCGAGAGTAAGGGGTGGTGAT
83	A01_2802074	A01	2802074	T	C	CNU_11717	AGCATACAGACACTCTCAACCCCCTGACACTTGGAAAACAAATCCTCAAACTTATCAACCACAACCTTCCTCTGATCCTCCTTGATGGGATGAAGCATTTTGATGGCGACTTCATGATGCTCATCGTAGTCCTCGGTNGACTGATGATGAGTAGCCAACCAAACNTCACCAAANGGACCTCTTCCAATCCGGTGGCGAAGCTTCAANGTTGCAGAGTTCATCCAGGGGCTAGCACCGGTTGCTAAAGCGC[T/C]CTCGGAGCCACCTTCAATGATCTCGTACTCAGAATCATCAGGCTTCTGAGGAGCTATCTTTGAATCCATATCTGAAACCAGGAGAAAAAAATATAGTTTCACAAGTTACAACTCAAAGTTTGTTAAGTAAGAACTCAAATCTCA…	GATCATTGAAGGTGGCTCCGAGA	ATCATTGAAGGTGGCTCCGAGG	GGGGCTAGCACCGGTTGCTAAA
84	A01_18902405	A01	18902405	A	G	CNU_11717	GATGACTTGCTTTTGGAAGCTGCTGGGAGAACAAACGCAGCTCCTCCTTCTAGGTCCCGTCCTCCTTCGNGGAGACGTGAAGGTTCTTACTCCGATGGTGGCAGCGATTCAAACTCTGATGCAGATCGTGNCTATCCATCAAGTAGAAAGCCTTCTGCTTCTCAAGTTCCTTTAAAGAAGAGACTAGAGGCAGAGAGAGATGCCACATCTGATCCTGAAGGTGTCAGCAGCAGCGACGACGAGGACTCTG[A/G]TTTNGGTGACGACCTTTACAAGAACGAGGAGGACAGGCAGAAGCTTGCTGGGATGACTGAGTTTCAGAGNGAGATGATTCTCGCCGAACGCGCTGACAAGAAAGGTGACAAGAGCTTCACTGAGAAGCTTAGGTCCAAGAGGGA…	CAGCGACGACGAGGACTCTGA	GCGACGACGAGGACTCTGG	TGCCTGTCCTCCTCGTTCTTGTAAA
85	A03_13053387	A03	13053387	T	C	CNU_11721	ATTGGCAAGATGATACAAAAGAGTGTGAAGGAGTAAAAGGGCAAGATGAGCTTCCTNANGAGGAAGAAGAGGAATATCAAATTAAATTTCTTGCCNATGCTTATCTGCAAAAAAAAAAAAAAAACACAACTATATCAGACACTAGAGCTACATGTCCTCGTTTTAAGGTTTGTTTGTTNACGGCACCTTTGATTTAATGACAGCAGGCAAACAAAGGCGAAATAGTTGCATAGGTCCTGAATGCCATCGG[T/C]GTTGTTGCTTTCTGTAAGCTTCATACGATTCAGGTAACTCGCAAATGCACTGNGAGAGAGAGTATGACATTAGCGCNGGCGTAACCAAATAATAATAATNTTTGATAGAATTACCTCAACATCGTTAAGGAAAATGAACTTCCA…	CATAGGTCCTGAATGCCATCGGT	ATAGGTCCTGAATGCCATCGGC	CTGAATCGTATGAAGCTTACAGAAAGCAA
86	A06_18921454	A06	18921454	T	C	CNU_11721	CCCTCTTCCTTTTTCGTTTGAGTTTCACTTTTTTCTCTCTCTCTCTCTCTCTCANNAACGAGGAACATGGCAGATTGGGGACCAGTTCTGATAGCCGTGATCCTATTCGTAGTGCTAACACCGGGGCTTCTTTTCCAGATTCCGGCGGGAGGCCGAGTTGTCGAATTCGGGAATATGCAGACGAGCGGCGCTTCTATTCTCGTCCACGCTATCATCTTCTTTGGTCTCATCACTATCTTCACCATCGCCA[T/C]CAACGTACACATCTATTCCGGTTAACTNTGTTAGCTGAGCTTATTACTNGTTTACGGAAAGTCTTTTCTTCTCCGCTTCTGTTTGTGCTTTCTAGTTTTTCAAAAATTGATGTAAGATCTGGCATTTTCGGATANNTGTGAATA…	TAACCGGAATAGATGTGTACGTTGA	AACCGGAATAGATGTGTACGTTGG	TTCTTTGGTCTCATCACTATCTTCACCAT
87	A03_32931636	A03	32931636	G	A	CNU_11723	AACAGCATCATCTTGAACTTTCATCCAAAGGGAACCTATACTCCAAAGTCTATTCTTGTGACAGAGTAAGGATTTACACCCATTTGAAAGAAGACCAAGCAAACCGGTACATGTAAATCAACATAATCTTTCGAGAATATGATATTACAACAGAGCAGAGGAGATTACGATGATAATCCTAAGATAGAAAAGAAAGAATAAAAGTCCGAATAAACAGAAATAACAATCGGACATAGCCGAAGATCAATCC[G/A]AACTAAATCGGAGATAAAAAACAAAAGGGGTGGCGACCGAAAGTAAGAAGAACCGCCGGCCACCGGATCTAGGTTTTTAGATTGACGAGTTTTCTAGAGAGCGTTTAGTGAGAGAAAGTTAGTGAGAGATACTTAAGTTGCAAA…	GGACATAGCCGAAGATCAATCCG	GGACATAGCCGAAGATCAATCCA	TTTCGGTCGCCACCCCTTTTGTTTT
88	A07_25206960	A07	25206960	A	T	CNU_11723	ACCTGACATTCTCAGAGCCTTTAAGCCTTACNNTGGAGGCTGGAACATCACCAACAATCACTACTGGGCTGTAANTCTCNTGTTCTTCTTNGTTTGTTGATTTGTTTGAGTTATAGGATCTGTAGTAATGAANGGCCATGTTCTTGCAGTCTGTTGGATTNACAGGTGCTCCTGGTTTCATCCTAGCTGCTGTCTGGATCTTNTCCTTTGGCTCTCTTCTNGTTGTATACCACTGCTTCAAATGGAGAGT[A/T]TGCGAGAAAGCTAAAGGATCATCATACAATTCAAGAAGNNTCTGTCTCATNTTGCTGATAGTNTTNACCTCTGCTGCTGCGTAATANTCTNAACCTTCCCCCCCATCATTCTCTTTTGCTGTTGTTGTTCNTGAGATTGAGTTG…	ATGATGATCCTTTAGCTTTCTCGCAT	ATGATGATCCTTTAGCTTTCTCGCAA	TTGTATACCACTGCTTCAAATGGAGAGT
89	A02_14410264	A02	14410264	G	C	CNU_11729	GTACTAGACGGTCGTTTCCGCCGCTAGCTAGTTGCTGACCAGATGCTGACCACTTGAGCCCACAGACCTCTTGAGTGTGACCCTTGTAAGTAGACACAGGGTATGACATGAACCGCACATCGTTGTTGAAGATACGTCCGTCCATTCCTCCGGTTGTCAATANATGANTGTTCCAGGCCAAGGACCCAACTCGTGTGTGGTGGAAGCCTTGCAATGTTCTCAGTAGAGTCTTGGTTACACAGTCCCAAAT[G/C]TGAACTTGACCATTGTTGAGCCCAACTCCAAGGTTGATACCATCATGCGCCCAGTTTAGACTTGTGACAGGTCCTTGGTCTTCACCATACGTGACAAGCGTAGTCACGGAGCCAGTGGAAGCATCCCAGAGACAAACAGAGTTG…	AGTCTTGGTTACACAGTCCCAAATG	AGTCTTGGTTACACAGTCCCAAATC	GAGTTGGGCTCAACAATGGTCAAGTT
90	A08_14363387	A08	14363387	G	T	CNU_11729	ATATATATATCTCAAAAGGAGAAACCAATGTATCCAAAAACAATGTTCATTACATAAGTAAACACATTAAAAAGCAACTTATCGGGTACAAAGAGTGAACAGTTTNAANNNACAAACACATTCAGACACAGAGTAGAAGAGTTCCAAACTGTTNTAAGAATCAAAGCGGACATGGCATAGAGAAAGCAGAGCATCAAAGCTGNAAGATCATCCATATCTCGGATGATCCGGTCTTGACATGCGTAGAATC[G/T]CCATTGGGAACATGAAATTCGGCTTATTGATCTCCCTCAAACTCATCAAGCTCGAGGTCCACCTAGTTATCTCCTCGCTCCTCAATGATATACACCCGTATAAGTCCATGTACTCAAGATCCGAACATCCTTCACAAACCAAAG…	CCGAATTTCATGTTCCCAATGGC	AGCCGAATTTCATGTTCCCAATGGA	GATCCGGTCTTGACATGCGTAGAAT
91	A08_19116729	A08	19116729	A	C	CNU_12239	GTTTTGAGATGCACCAAGTNCTGAAGCTTCATGATAATGAGGTACTTCTCCTAAGTACCCTCTAAAATCTCTTTACTACCAAACTTTGTAGCGTAACAAAGCCGGATCTGATATTTTGGGAGCTATAAAAAATTTTAAATTAATCATAATAATTTTTTGACAATTTGGAAGCCATACGATATATATATATATATAATAGCTCTTTTAAAATCTGAGAGGTGAACGTTAAAAGTTGTGTGGCAGATATCAG[A/C]AATCAGTGAATATGATCCTCTGGACCTATTCTCTGGATCGAAAGATAGAATACACAAAGCAATAAGAGCTCTCTACGCGACTCCTCAGAACAACTTCCGCGTGTTCTTGAACGGCTCTCTTGTATTTGGAGGCTTNGGNGGTGG…	GTCCAGAGGATCATATTCACTGATTT	GTCCAGAGGATCATATTCACTGATTG	GTGAACGTTAAAAGTTGTGTGGCAGATAT
92	A09_20123503	A09	20123503	C	A	CNU_12239	AGATGATGATCTGCGAAGCTTTGGGGAACCTCGACGGAGGAACTCAGCCTTCTTACCTAGTAAACCCAAAGGGGCTCTACGCTTTCCTCCACGCGTGGATGATGATGACGGTTTTGATCTCTCAAGAACACCTTTATCATTGCGCTCATCCTTCTCCGTACGCTTAACGATGTCAGCCTCCATATCCATTAGGTCCTCTCCCAGCAAATCATCCCCATTCCTGTCCTCACTCTTATCTGCGTCATTTAAC[C/A]TCCCTGCACTGTTACTTGTAATTTCCATGTCATTTAAAGCACCAATAACCTGAGCATCGACCGGTAATACTTCCTCCGTAGGAGAGAAAGTTAACAAGTGAGGAGAGACTCTAGGTCGTTTCGTCACATTATCATCAAGAGCTT…	CACTCTTATCTGCGTCATTTAACC	CACTCTTATCTGCGTCATTTAACA	TGCTCAGGTTATTGGTGCTT
93	A01_6397442	A01	6397442	G	T	CNU_28026	TGGTTTCATTGAGAAGACCTTTCACAGATGATGGAGAAGAAGAAGTTGGAACTTGAGAGAGGCCAAGGTGATCCCAAGTTCTTGTGGTTTTCAGTTTCACAATCCGGTTTGGTATCACATGGATTACTGAAGGATGCTCTGTGTTTATATACAAGAATCCGGTTTAGATTACTGAAAGAGGCTAATATGATCACAAGTTCCGGTTCAAAGCTCAAATATATAATAGATGTGAGTTTTGTTGAGTACCTGA[G/T]ATTTTCTTTGCTTGGGAAGATGTAAGAAGNGCAGCGAAACCAGAGAATCCATGTTGATAGCTGTATATCATTGAGTTATGTGCCTCTTCTTTGCTGTATATAACATGGTGAGAGATGTAAGTGAAAAAAATACCACATGTTAAA…	GATGTGAGTTTTGTTGAGTACCTGAG	AGATGTGAGTTTTGTTGAGTACCTGAT	CTTCTTACATCTTCCCAAGCAAAGAAAAT
94	A06_7998998	A06	7998998	C	A	CNU_28026	CTTTTAAGCCTAGAGATACTGTCAAAACATCNTTATCCAGCAATGCAGCTACAAAACTNGACTCTGAGCATCCAATGTCCAACACTATACGAACATTCTTCCCCCATTCAATGTCTGGTACCATCTATTAAAACACCAATCATGTTTTCAAAAGGTTCTCTTACACAGAGCTTTGAGATTAACAAATGATANTCACCTCTTGGATGAATTCAAGGTACTGAAGAACATTTCCACTGAAGGCAGTCTTGTT[C/A]TGTGGGAANGTTAGGTATTCACCGGACTCATTCACCCAGTTGTGCTTCTTTATATATGCAGCCAACTTCGGATGCGCCACGTTCTTATACAATATCTGATGTGAATAAAGAAAAAAAAGCATGAGATGAAAACTAACTTAAAAT…	ATTTCCACTGAAGGCAGTCTTGTTC	CATTTCCACTGAAGGCAGTCTTGTTA	GGTGAATGAGTCCGGTGAATACCTA
95	A05_3127087	A05	3127087	T	C	CNU_28028	TAACTAAGTATGATATTTGTACGAATAAAAAATATGATTTTTATAATAGATAGATTTCATGAAAACACACTAAGAGATACTTTTTAATATNACTTAAGGATTACCATCTAAAAGCACATATAAACATAAACGTAAATCTAATTAATAATGATCCTAATTGTTCTTTAACAAAAATCTTTTCGTGAGGCTATTTGTCTGTTAACATATATGATTGGAANTATTTTAGCAGATTTTAGCAAAAATCTTTTCG[T/C]CCGTTTATAATTTGTTGCTAAGGGACTTGCAAAACATAACATTTCTCATAGTTAAAGTTTACAAAAAATTTAACTATGAGAAATGTTATGTTTAAACGGACGGTGTTTTTTGGTGGTGTAGTGATGTATACCAAAAAACTCAGA…	ATTTTAGCAGATTTTAGCAAAAATCTTTTCGT	TAGCAGATTTTAGCAAAAATCTTTTCGC	GTTATGTTTTGCAAGTCCCTTAGCAACAA
96	A09_12996761	A09	12996761	C	T	CNU_28028	GATACTGAGCTTTCCCTTGTTATTCCAAGCAACTGATTCCACTTCNTCCTCAACATCTCTGTGTTCTGTAACCCTAAACCAAAAAAGTACTCCTGCCAGTANAAGAAACTCTAGTTTAGAGATTATTAGAGATGATGATTAATAATCTATGTTTACTGTTTTATATTATTATTTAACTGCGTCTTTGTCGCATAAGAAAGCCTCCAAAGTTGCTGTTGGATCCTCCAGGGTCAACAAAACTCGGTAATGA[C/T]GATTCTCGTCCTCTTCTTGCGAACGAAATGCAGATACGACTCGAACAATGCATCTGTATTTGTATGTAACCTGTATCCAAGTAACAATGATTTTCATTCTACTACATTCAATATAATGTTTAAAAAAAAAACAAATCGGTTACA…	CGCAAGAAGAGGACGAGAATCG	CGCAAGAAGAGGACGAGAATCA	CTCCAGGGTCAACAAAACTCGGTAA
97	A02_16787455	A02	16787455	G	A	CNU_28066	GCGAAGAGAAAGCAGTTGGTAAATGGAGTTTGAAGAGAAAGATGGTGGTTTAGGGTTTTCATTAATGGAAGTGAAATCAAGATCAGGCAATGAGAGAAAGAGAGATCTCCATCGTTTCGAGAGTGAGCTGGTTATAGCTGCANATTGTAGAGGAAGTAAGAGGAGAATCTGATGAAGAAGAGAGTCAGGGAGGTGGCTNATCCTATCTACTTTGATAATCTCTTCTCTNTTCTTCTTCTTTCGCTTCACA[G/A]ATCTTATCTCCATTTGTCAAAACCCAATAACCCTAATCAAGCTTTTTTTTTTGCTTTTTGTTTTCTTCTAGCCCGAGATTAGGGTTTGAAACATTCAAAACAAACCCTNAAANTCATAACGATAAGTGCGTTGAGAGTTTGTTT…	GGGTTTTGACAAATGGAGATAAGATC	ATTGGGTTTTGACAAATGGAGATAAGATT	AGGAAGTAAGAGGAGAATCTGATGAAGAA
98	A04_15515501	A04	15515501	G	A	CNU_28066	CAGCGCGTTTTCGCTTCGATCTTTTGCTTCTTCTTTGGCCAACGTCAGGCAANGGCTTGCTTGTGCTCGAAGCTAACGCTCCTTCACGAACCTCTTCTTCCTGTTCCATCATACTTACTCAATAAGTTCTTTAACGTAATCATGTAATTATTTACTTGATCGAGTTGTAGTTTACGAGTATTACCTCATCATCGGACCCTTCTTCTGATTCAGACTGAGATTCTAGCAATTCAACTGTATCTTTCGCAAC[G/A]GCCTTGTTCTTCTTGCTGCGCTTCTCTTGCTCTTTTAACTGTCTAAATCTGTTGTAGTAGTTCAATATAACATCCNACGCTTGTAAGAATAAAATGTTAGAAGTCAAAGATTATAAAGAGATTCCCTCACCTTTCGCCAGCATC…	GCAATTCAACTGTATCTTTCGCAACG	AGCAATTCAACTGTATCTTTCGCAACA	CAAGAGAAGCGCAGCAAGAAGAACAA
99	A07_129048	A07	129048	A	G	CNV	CAGGAACCAACATAGATCATCCCCAAAGAAAGTGAAGCAAATGCAATCACATCTAGAGGTGCTTTTTCGCATCATTCAGTATCAGCGACAACTTGCTTCTTATCTATAGAAACAATGAGCAAGTTAATGTTTCGTGAACACGCAAAACATTCAACAAGTAATATAAGAAAGATAAGAAAATGACAGTGACCTGGTCATTTTGGGAACCTGCGTATGCAATTCCAAGACCCATGATAGCACCAATTCTGAC[A/G]GACGAATCCTCTTTGTCTANATAGTCTCCAAGAAGTGCCAATGCCTGAGAAATAAAGCTGAGTAAGATGAAAGAATAGCTGGAAATATTAGTGATTTCCGTAAAATCAAACAGGACATCATCAACTCACAGGGTCACAATCGCT…	ACCCATGATAGCACCAATTCTGACA	CCATGATAGCACCAATTCTGACG	GGCATTGGCACTTCTTGGAGACTAT
100	A09_9923065	A09	9923065	G	A	CNV	GTTGCAAGACCTTTCATTCCACCTCCATCCATGGTGAGTATACGCAGTCCTTGTTTTGGTACTTGCCTACCTTTTATGGAACGTCGCAGAATATCATTTTCTCCTGTCATCAGAGGAACAATATTTTATGTAATGCCCAGCTCAGAGTGTTAAACAGTTATGCAATATAGCACATCAAGAAACACACCAAGAATTGCCAAAGCTCGAGCTGCAGCTTTATTGACTCGTGGTTCAGGTGTGACAGTCAACC[G/A]CATCAATAACTCCCTCAAACTCTCGGAAGTAATCAGAATACGACGATTTTCCAAACAGAAGGCCAAGTTCCCAACTGCTAATAAGGCTTGTCTTTGAACCTAAGGAAAATGAAAACTCAGTTAAAAAAGCTGCAGGTTTTACTT…	GTTCAGGTGTGACAGTCAACCG	GGTTCAGGTGTGACAGTCAACCA	ATTACTTCCGAGAGTTTGAGGGAGTTATT
